# Supplementary material for: Metal-free cross-coupling reaction of aldehydes with disulfides by using DTBP as an oxidant under solvent-free conditions
Source: Royal Society of Chemistry journal article supplement (doi:10.1039/c4gc00025k), 2014-01-01

## Electronic Supplementary Information

### Metal-Free Cross-Coupling Reaction of Aldehydes with Disulfides By Using DTBP as an Oxidant in Solvent-Free Conditions

Jing-Wen Zeng, Yi-Chen Liu, Ping-An Hsieh, Yu-Ting Huang, Chih-Lun Yi, Satpal Singh Badsara and  
Chin-Fa Lee\*

Department of Chemistry, National Chung Hsing University, Taichung, Taiwan 402, R.O.C

E-mail: [cfalee@dragon.nchu.edu.tw](mailto:cfalee@dragon.nchu.edu.tw)

NMR Spectra ( $^1\text{H}$  &  $^{13}\text{C}$ ) for Compounds **3a-3s**, **4a-4v**

### S-phenyl 4-methoxybenzothioate (3a)

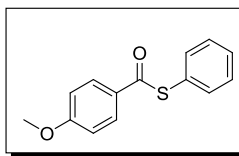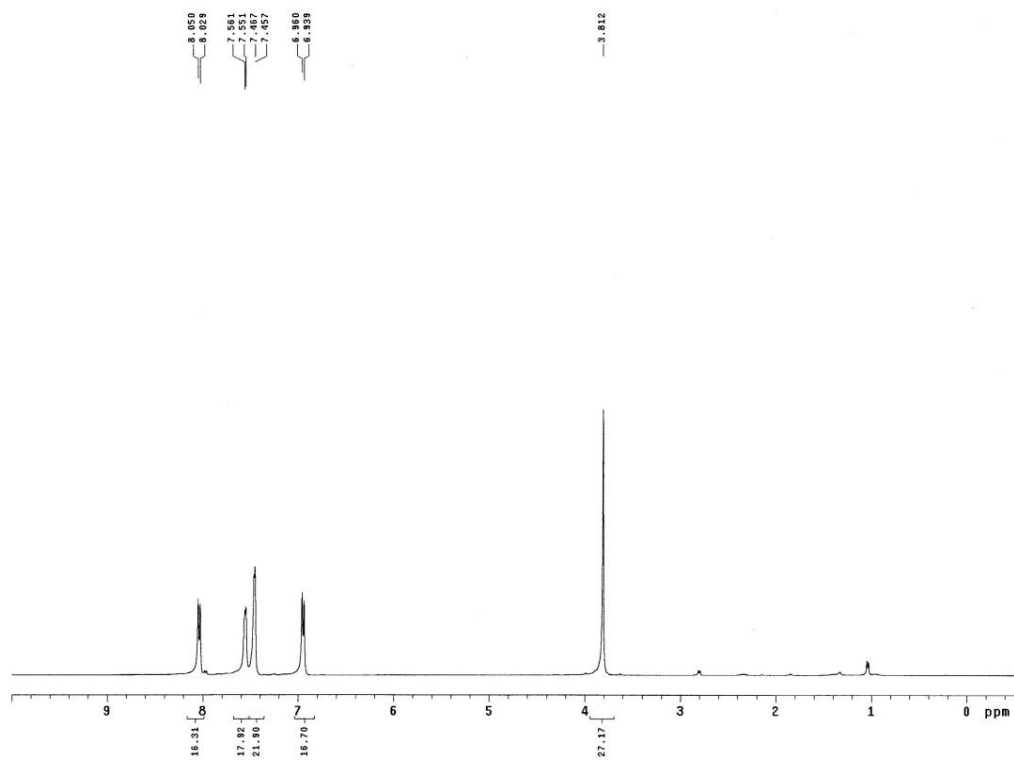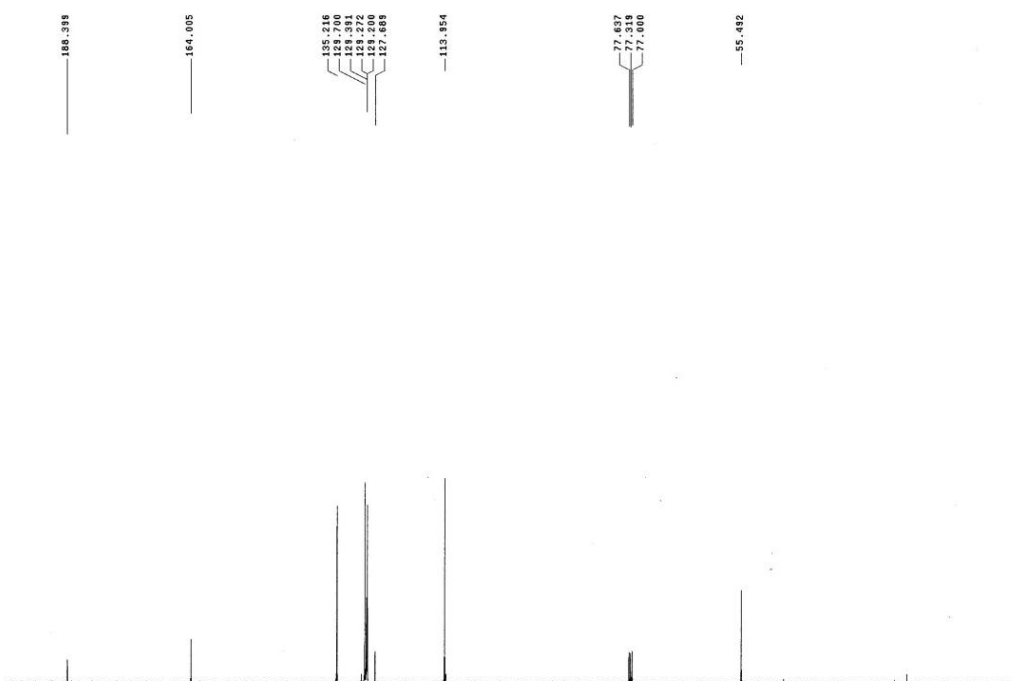

**S-{4-(Trifluoromethyl)phenyl} 4-methoxybenzothioate (3b)**

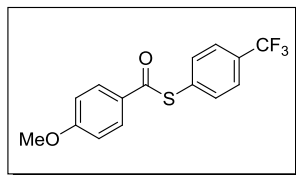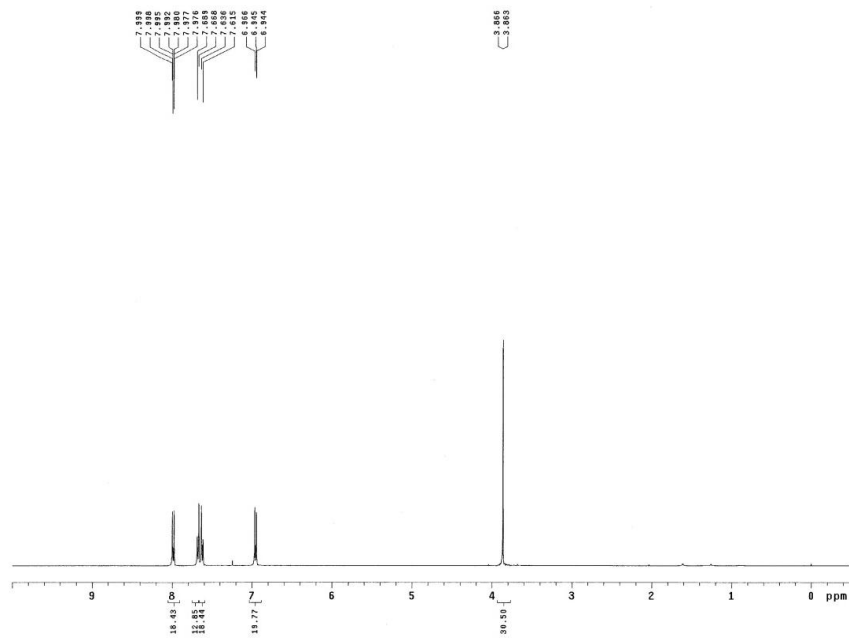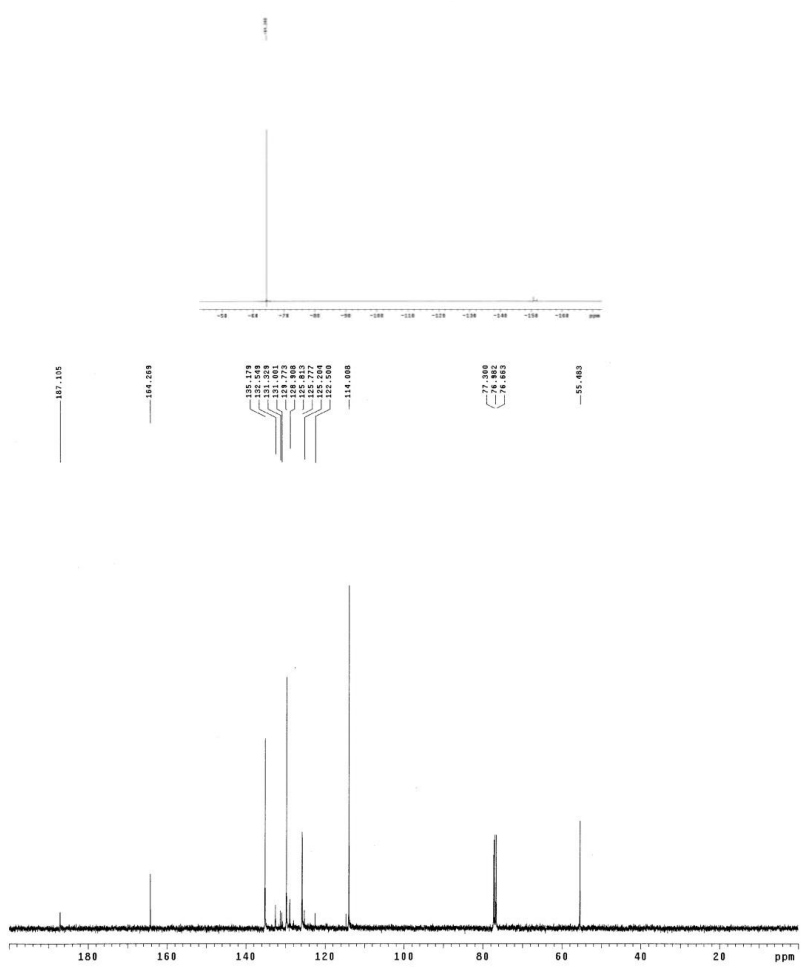

### S-(4-Chlorophenyl) 4-methoxybenzothioate (3c)

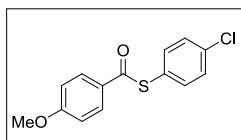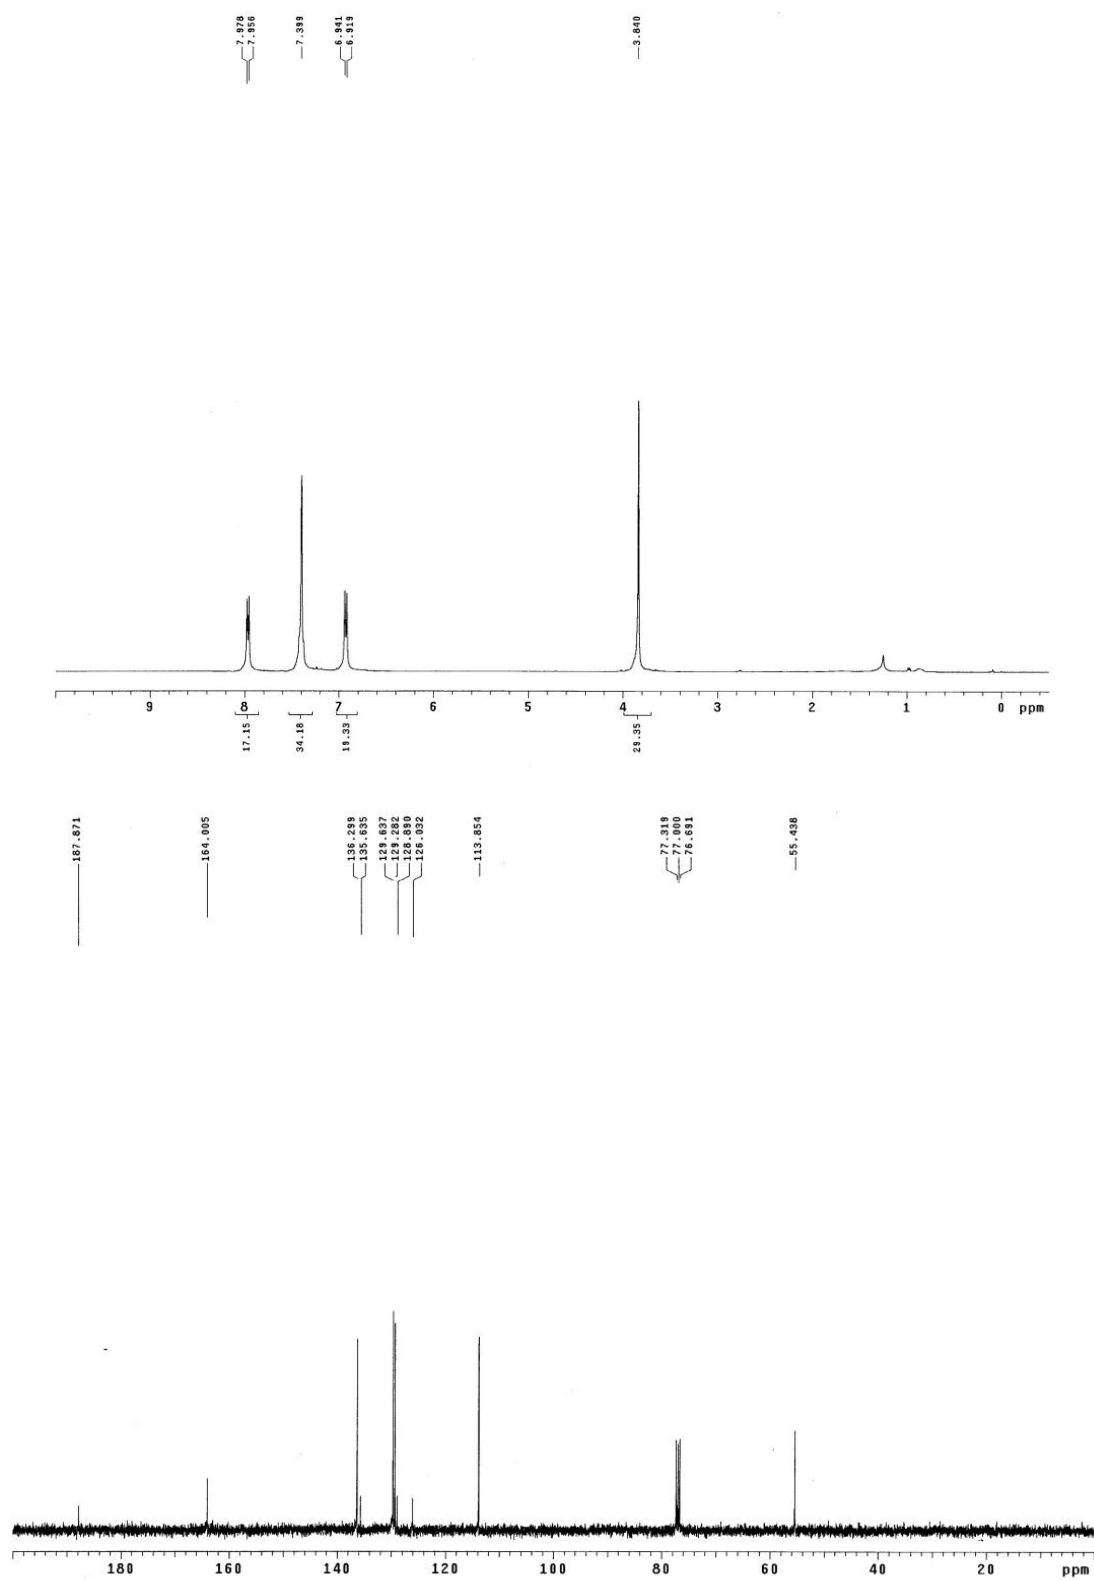

### S-(4-Bromophenyl) 4-methoxybenzothioate (3d)

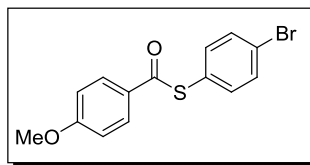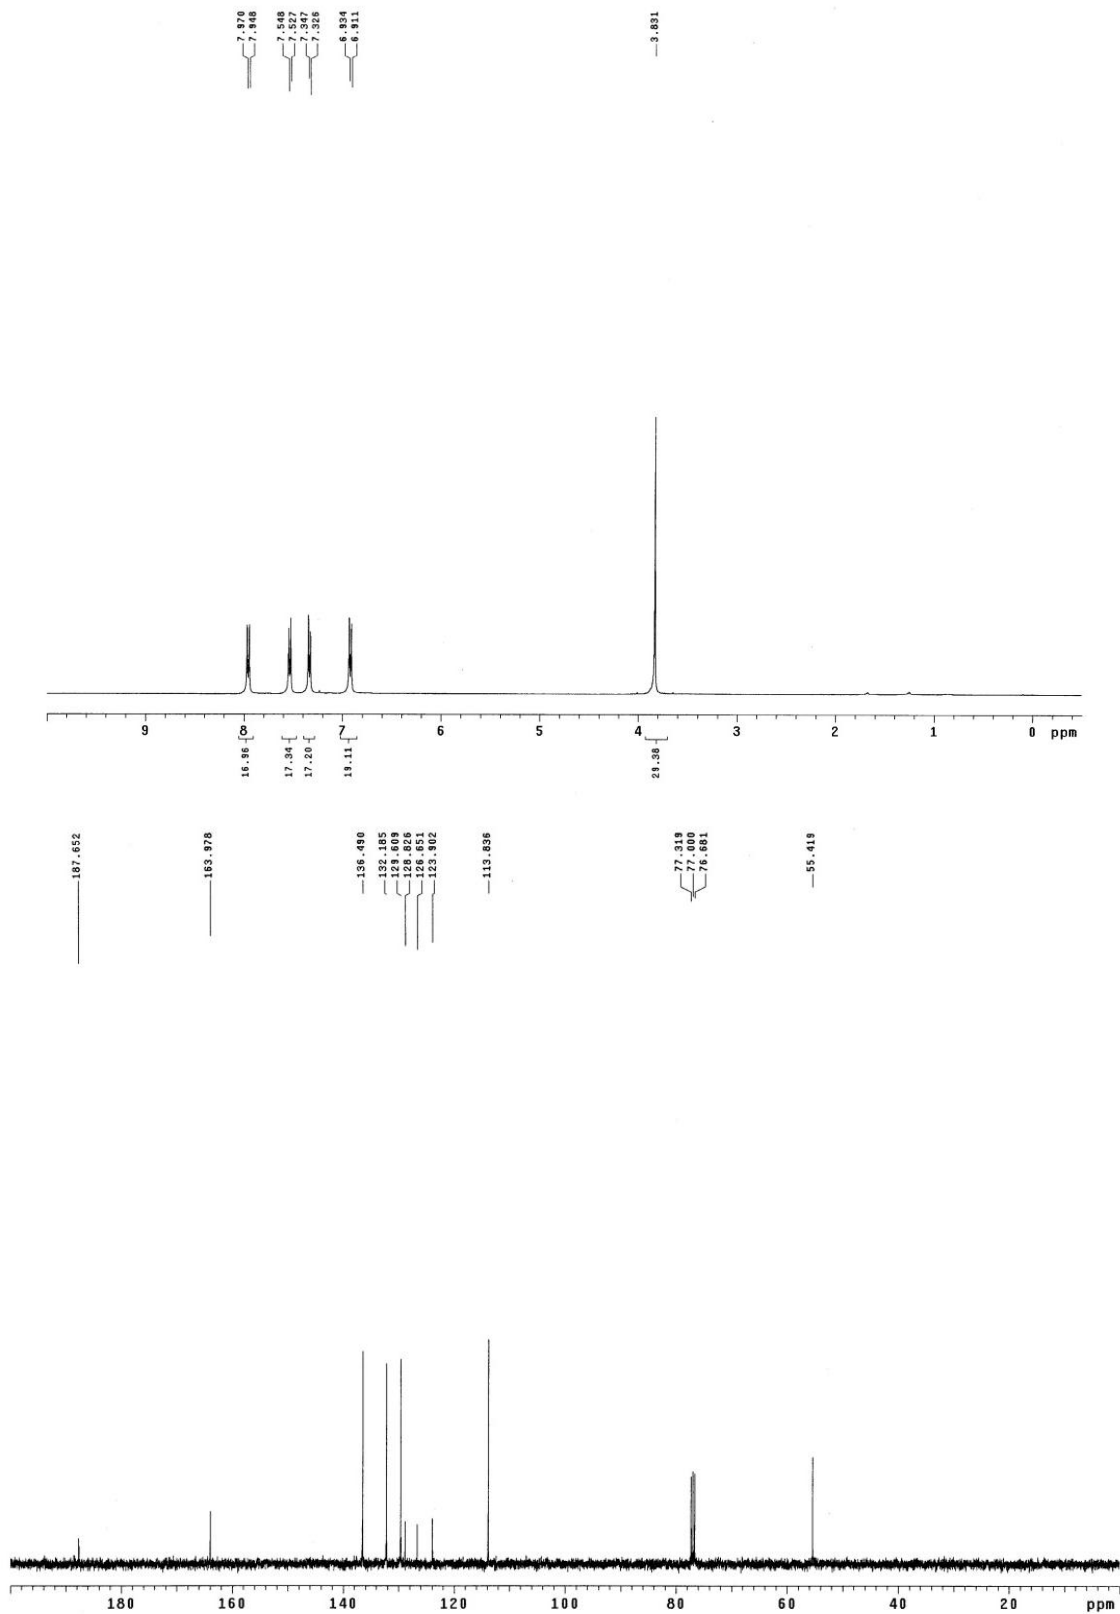

### S-Phenyl 4-(*tert*-butyl)benzothioate (3e)

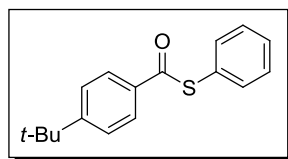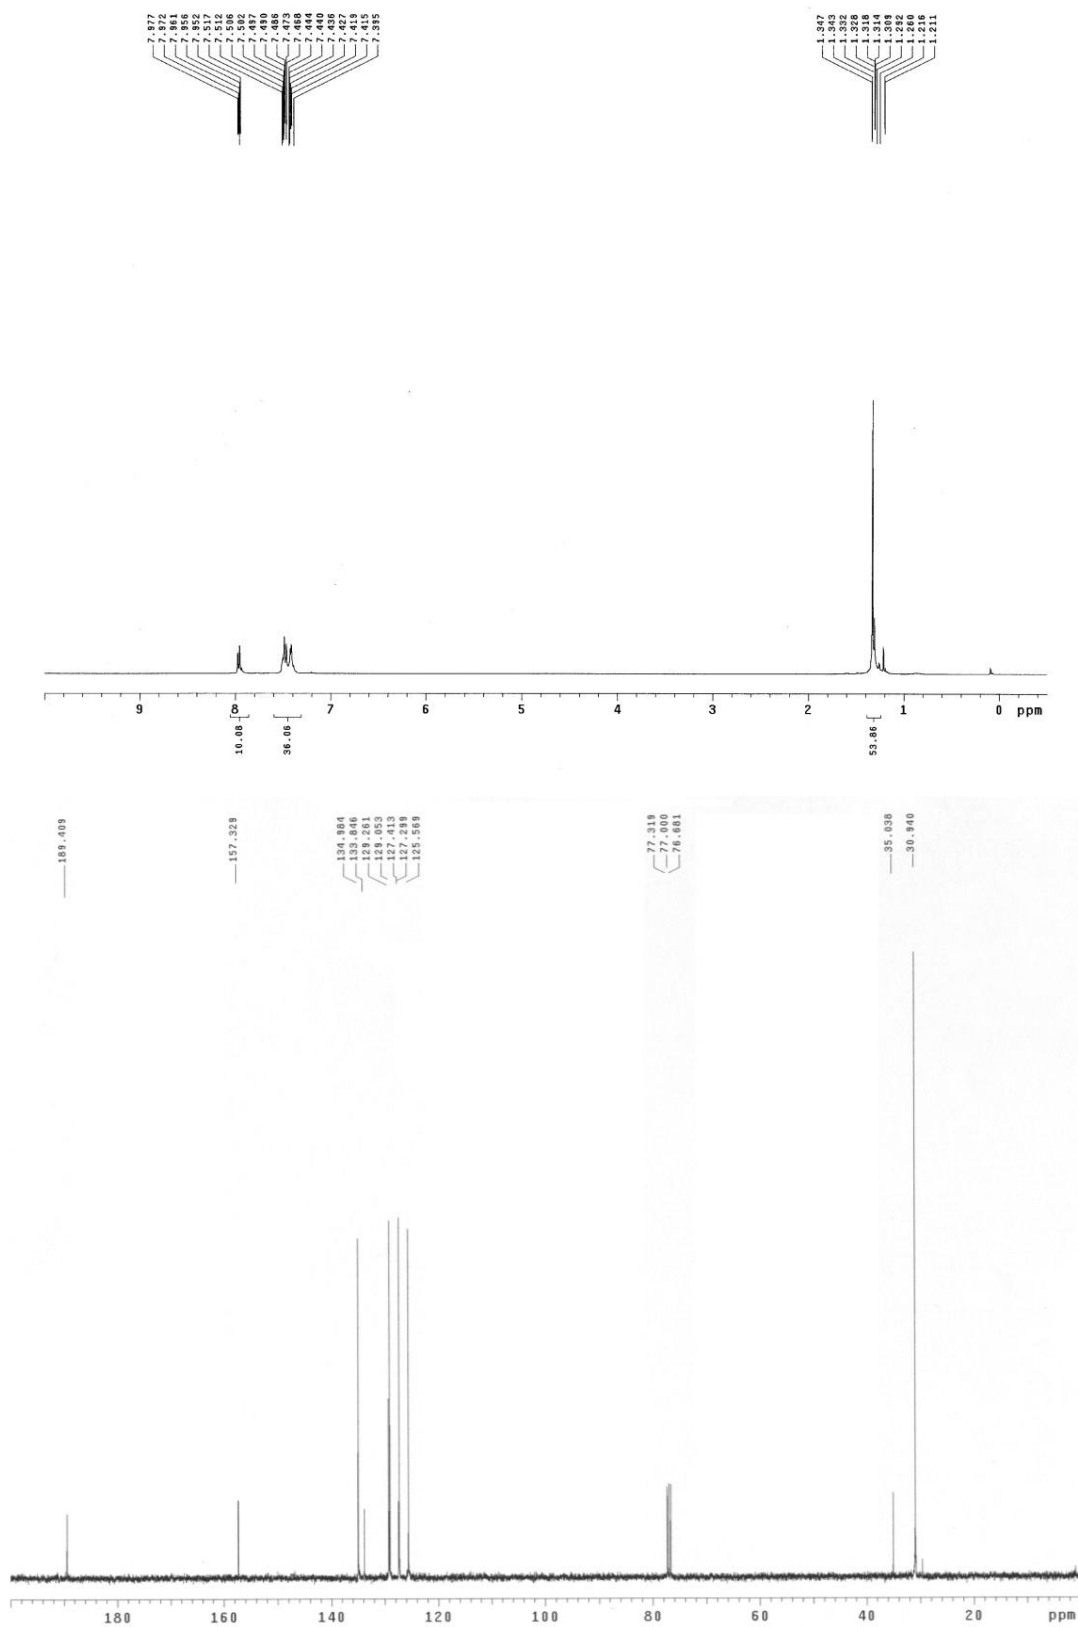

**S-(4-Chlorophenyl) 4-(tert-butyl)benzothioate (3f)**

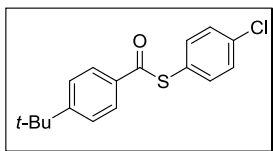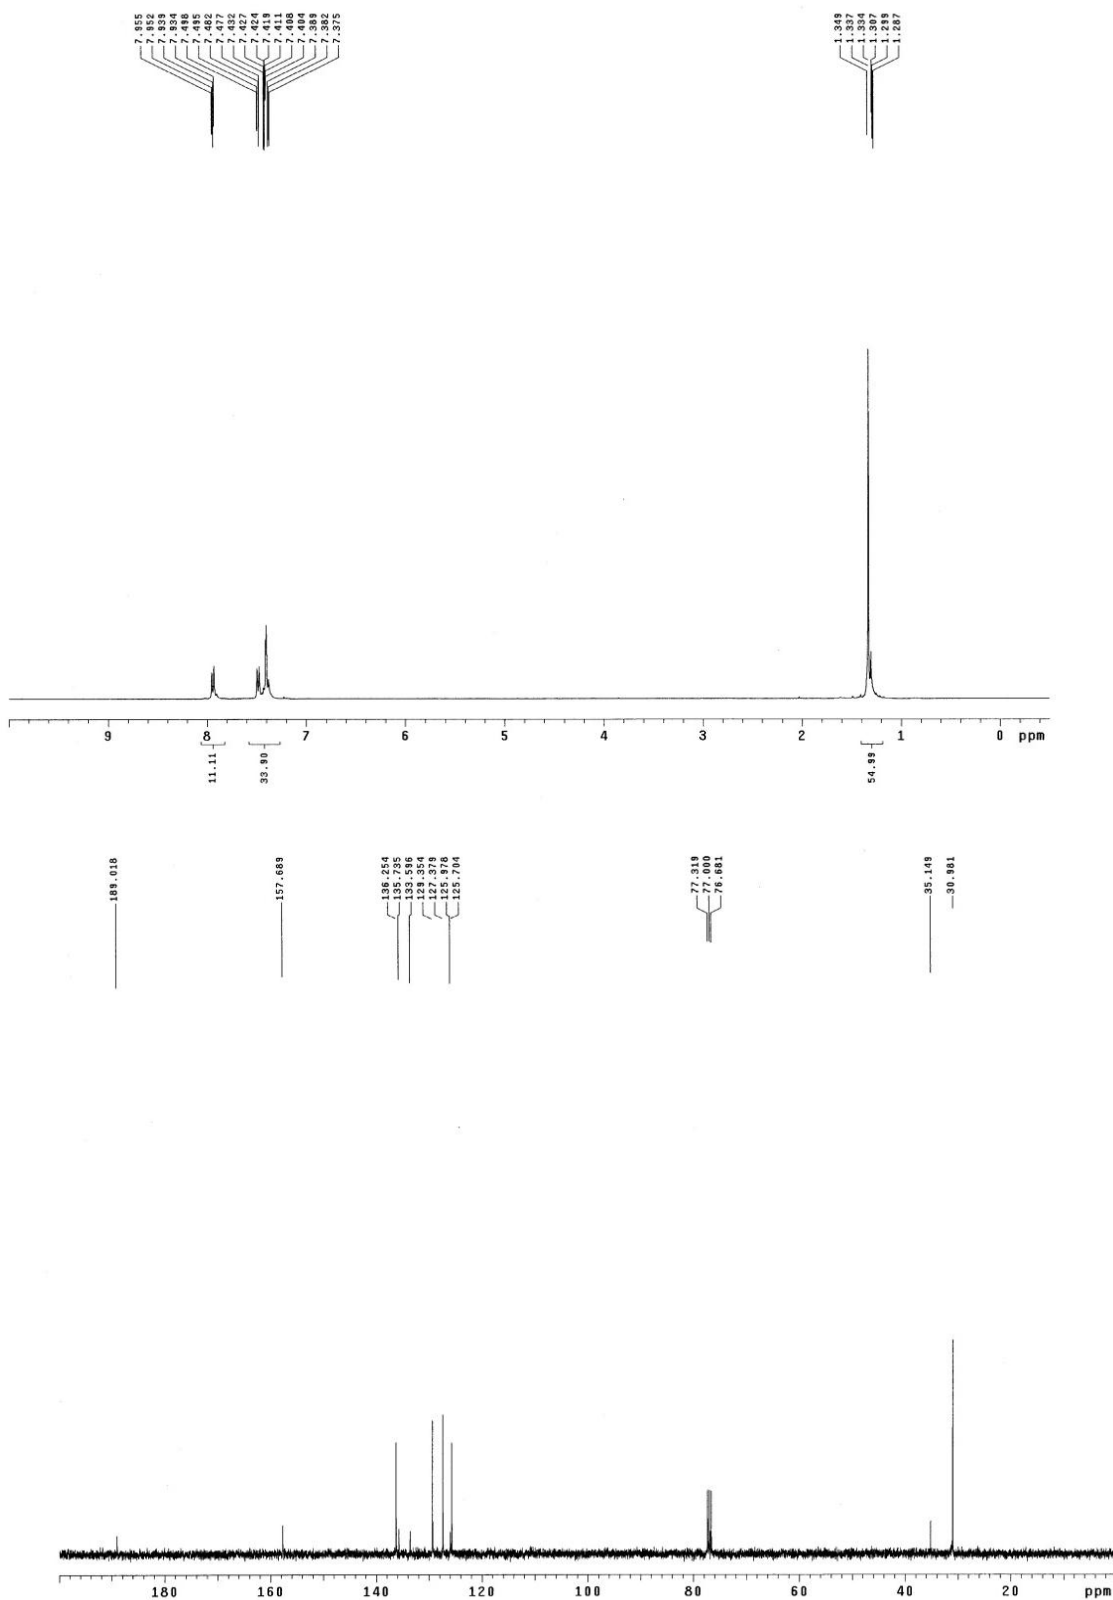

### S-(4-Methoxyphenyl) 4-methylbenzothioate (3g)

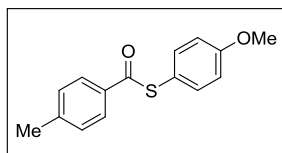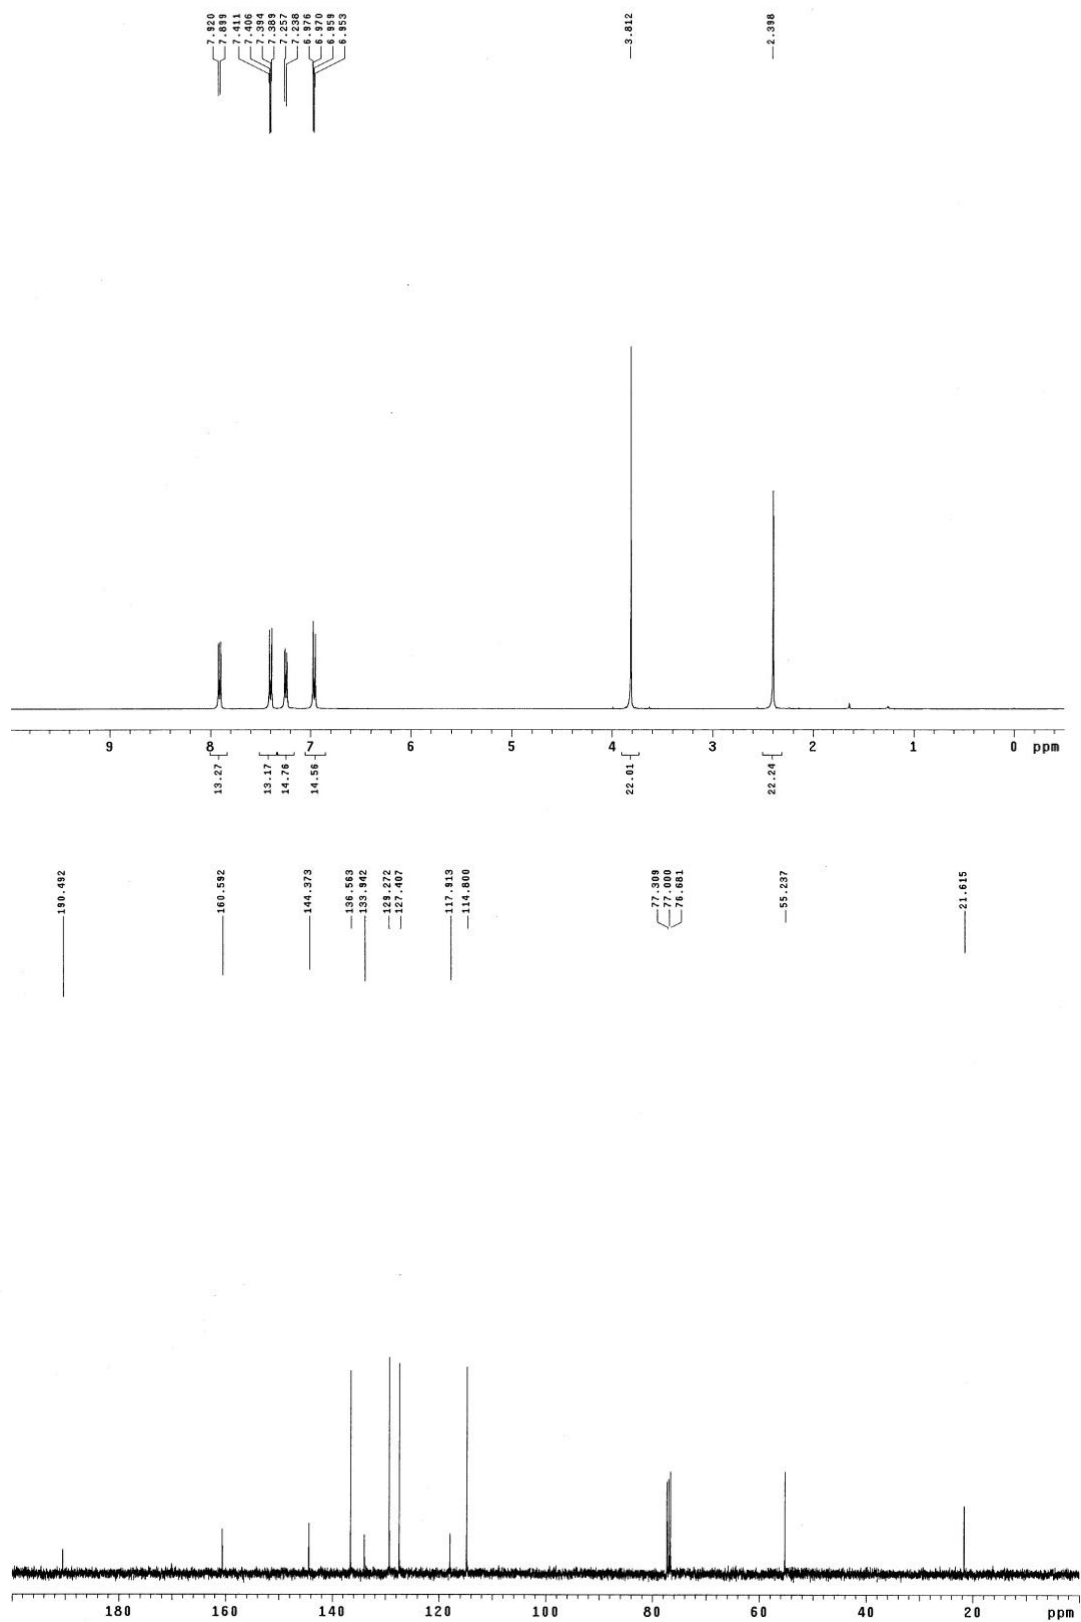



### S-Phenyl 4-methylbenzothioate (3h)

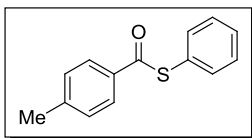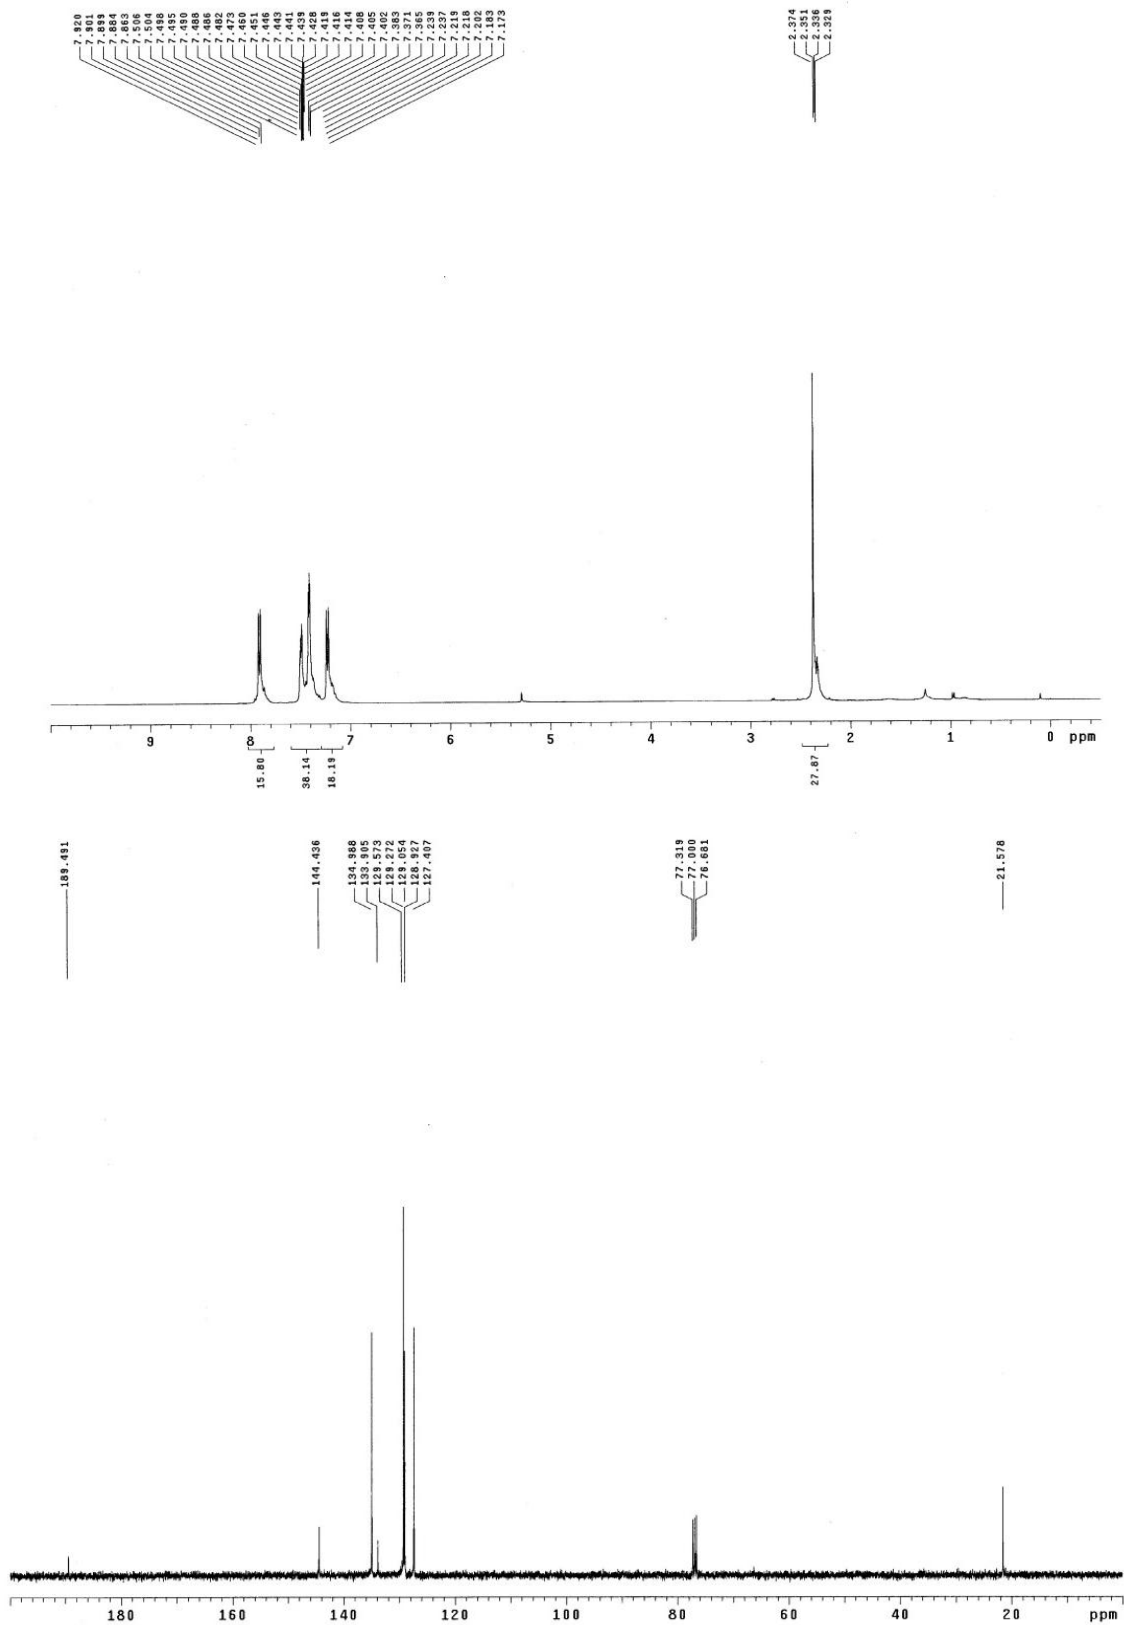

### S-(4-Chlorophenyl) 4-methylbenzothioate (3i)

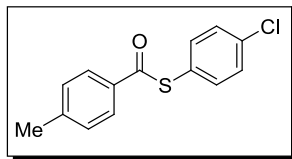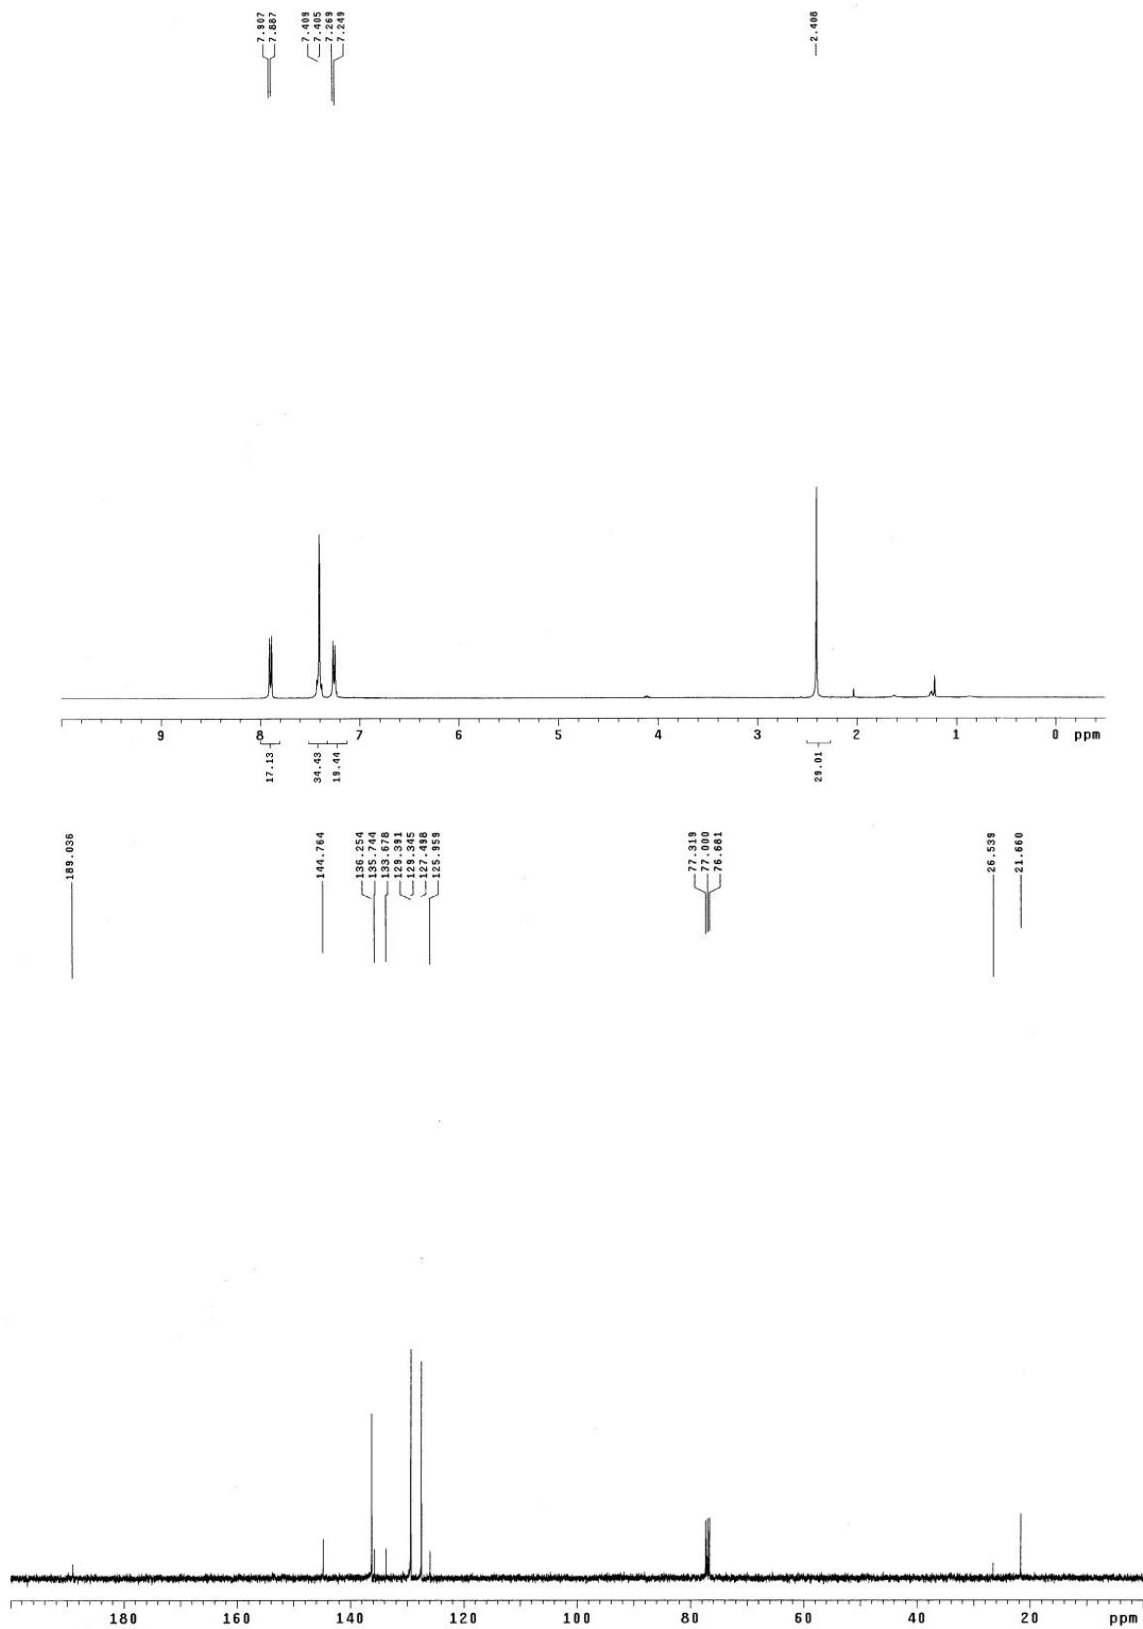

### S-Phenyl 4-chlorobenzothioate (3j)

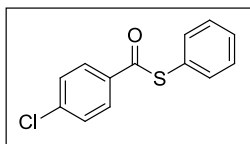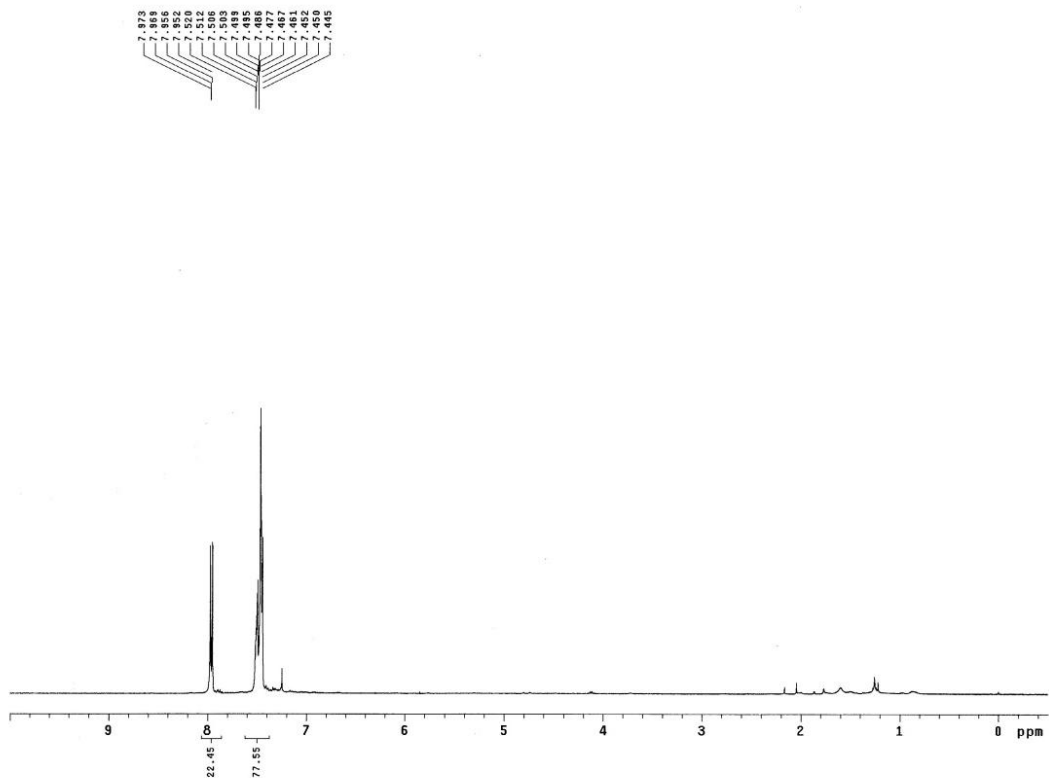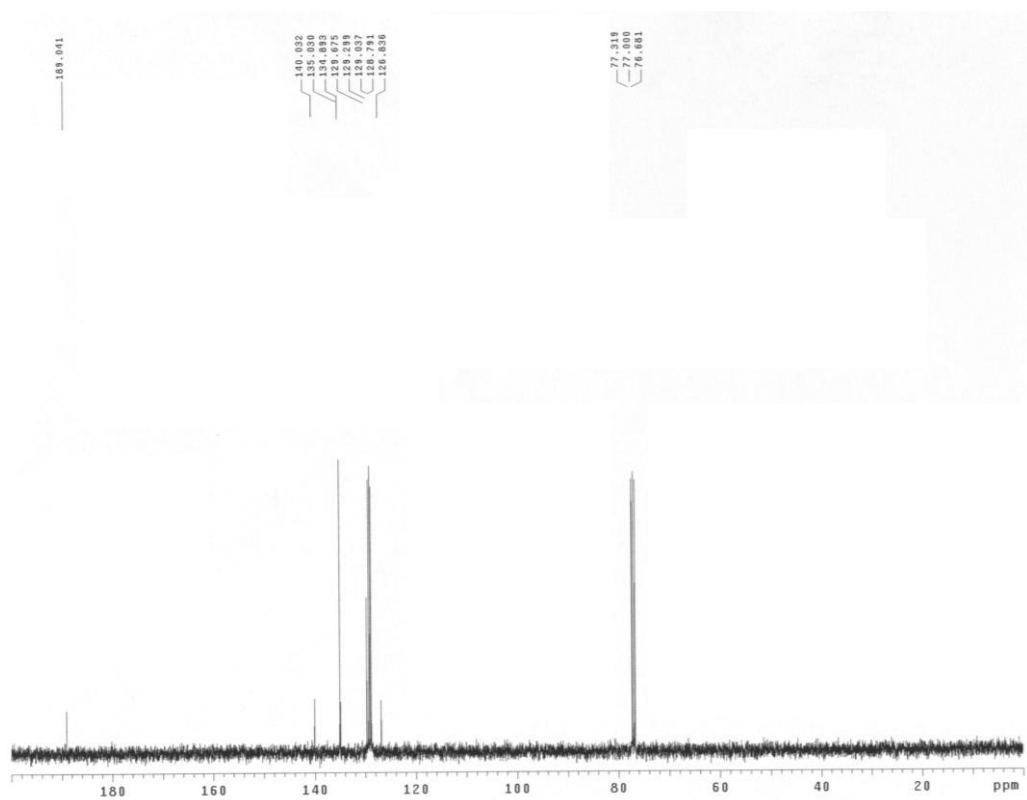









### S-(4-Chlorophenyl) benzenothioate (3o)

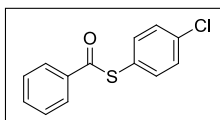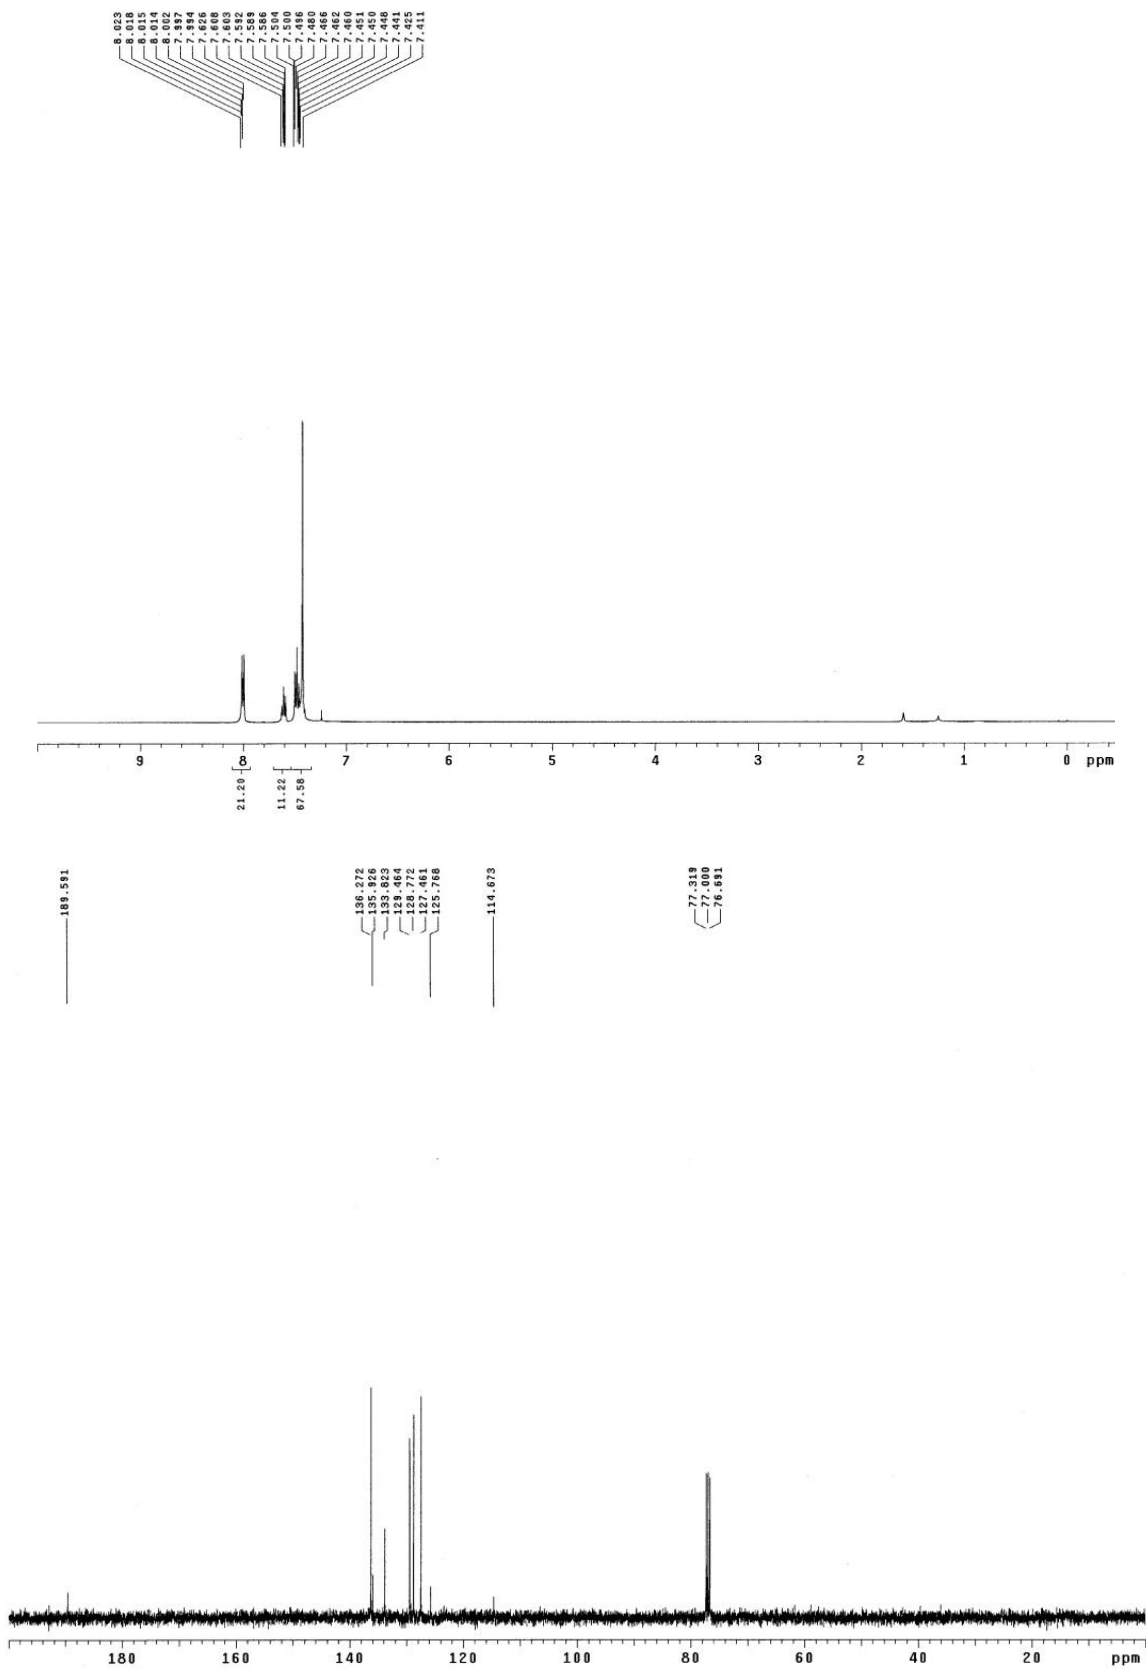



### S-Phenyl 2-methylbenzothioate (3p)

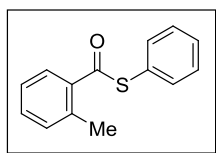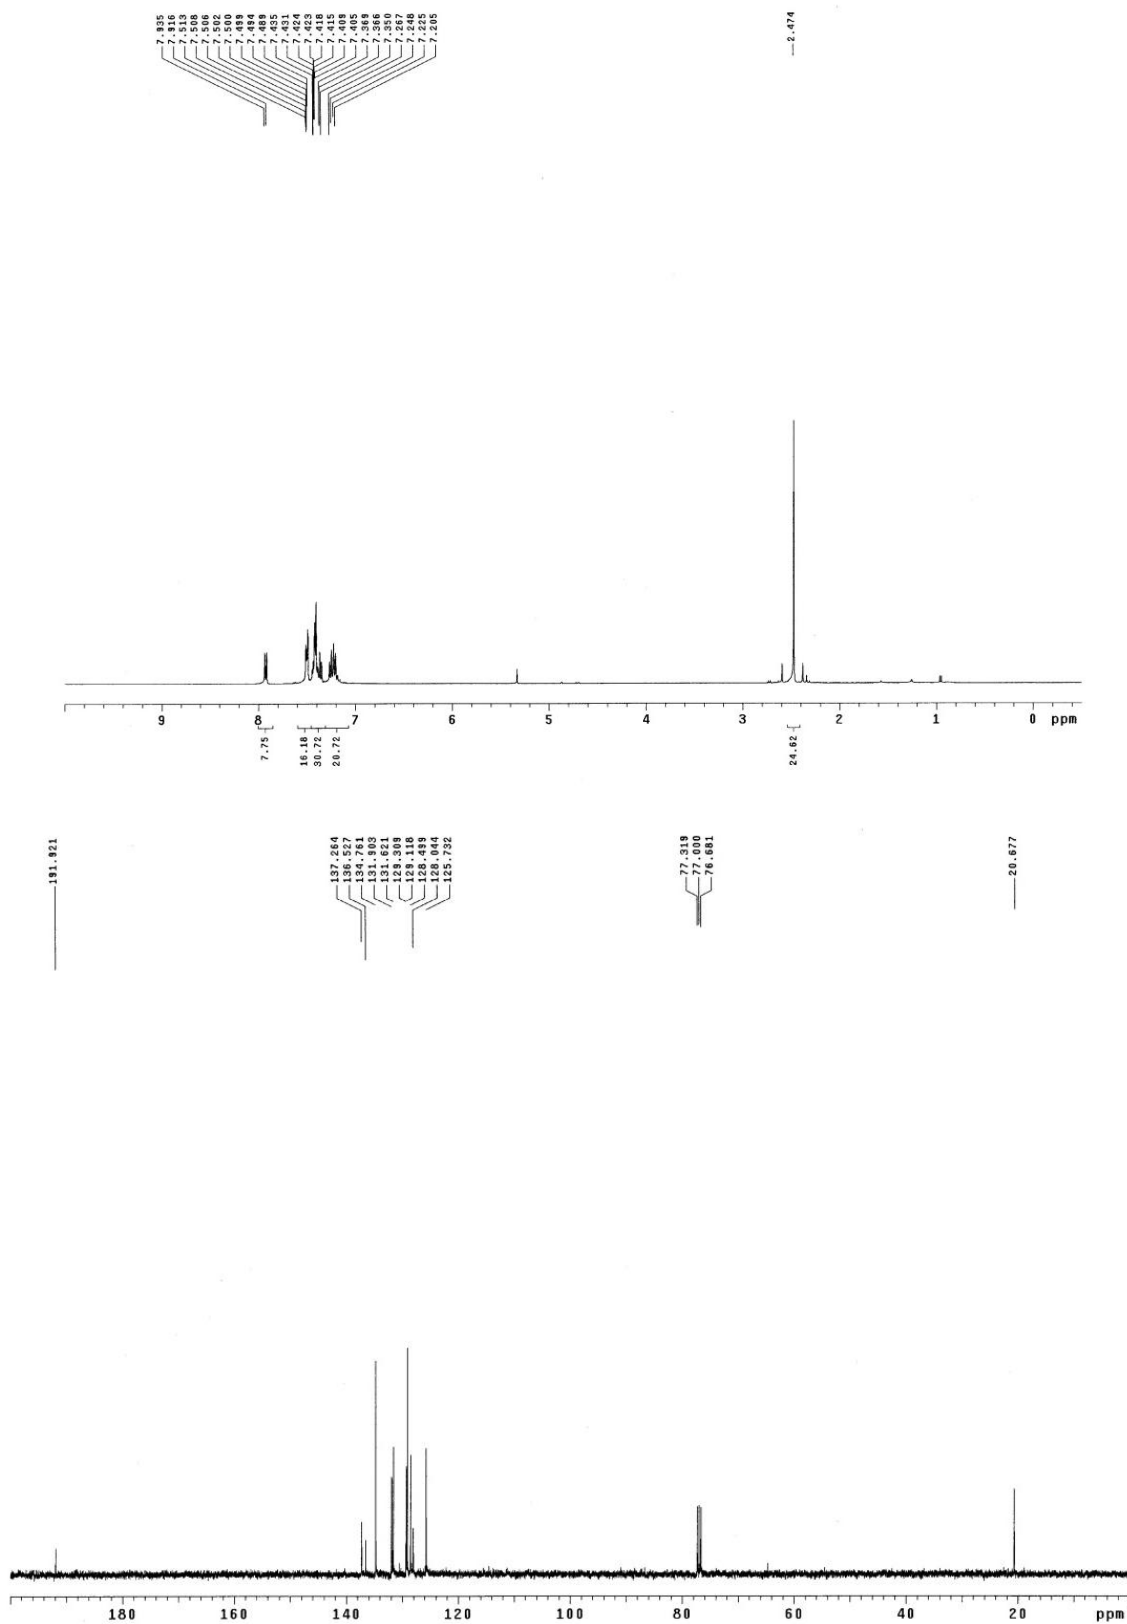

### S-(4-Bromophenyl) 2-methylbenzothioate (3q)

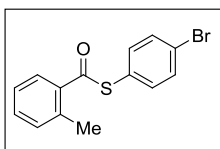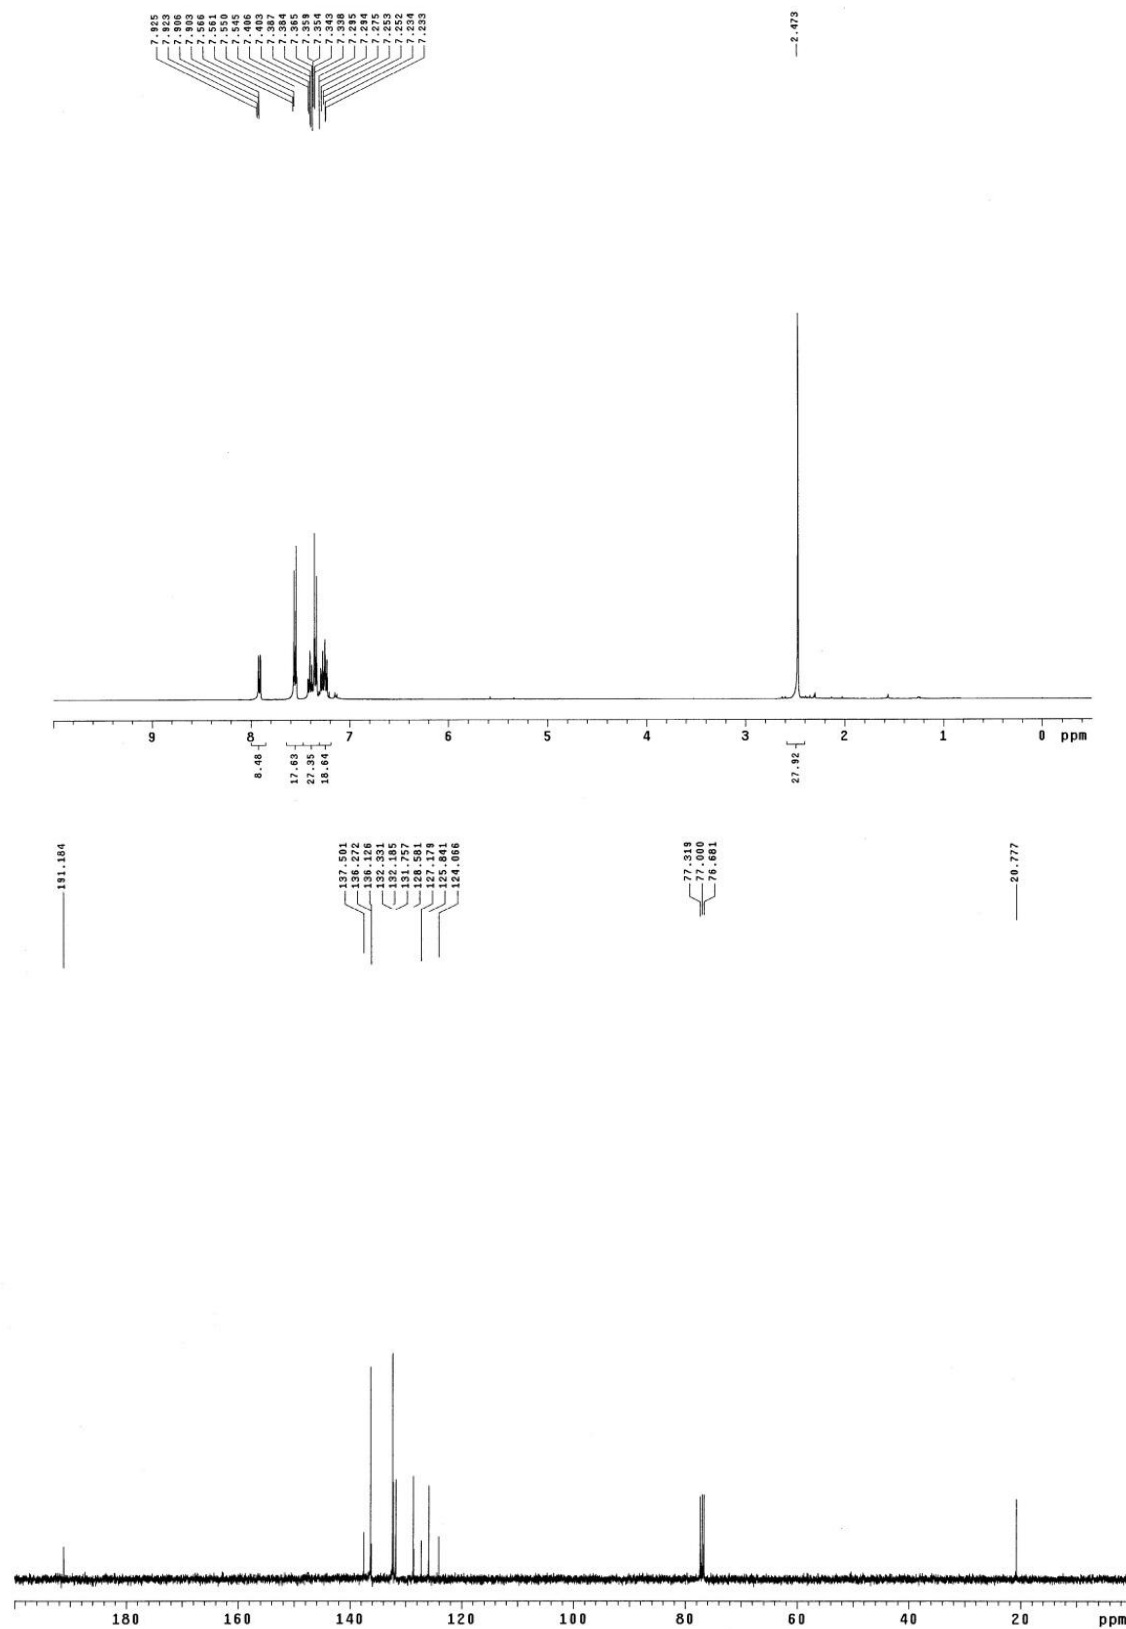

### S-(4-Chlorophenyl) 4-bromobenzothioate (3r)

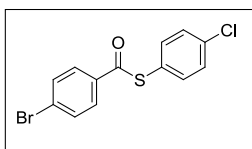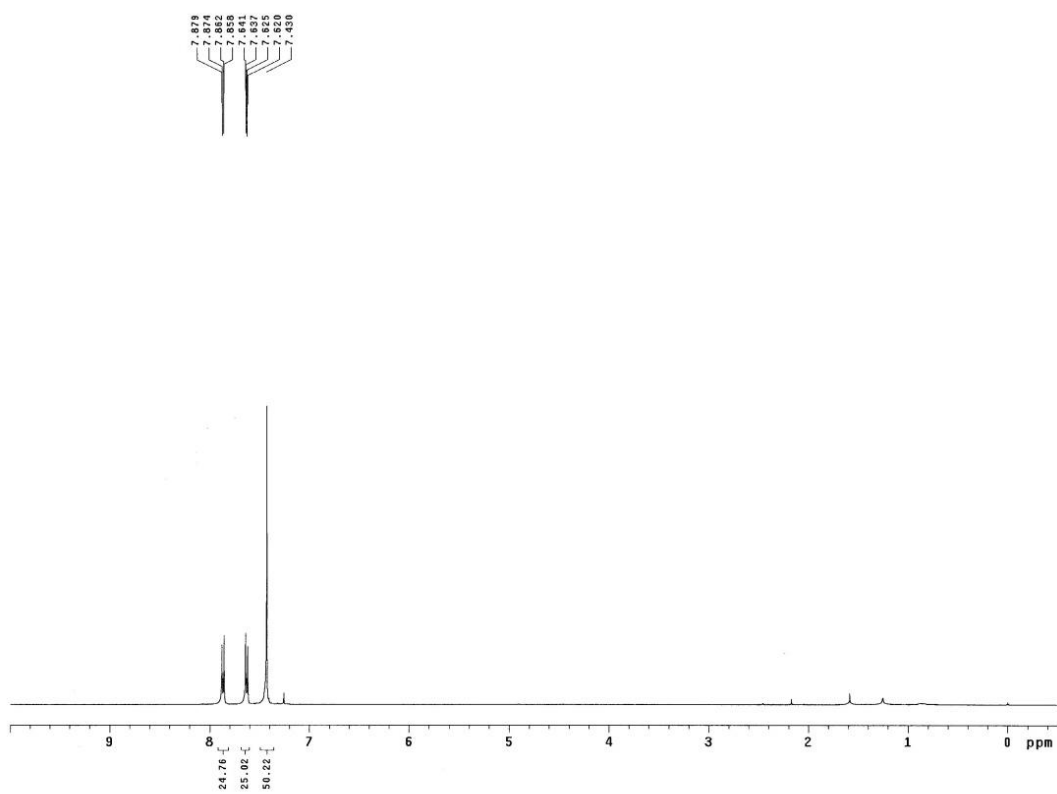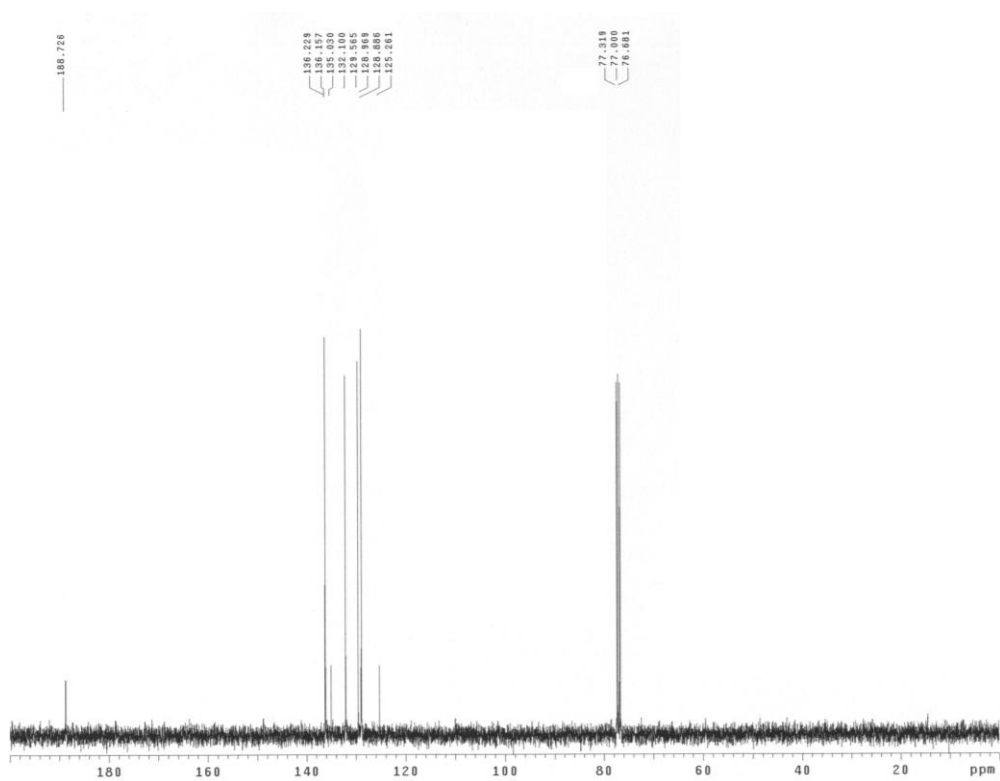

### S-(4-Bromophenyl) 3-cyanobenzothioate (3s)

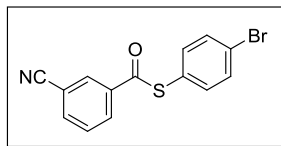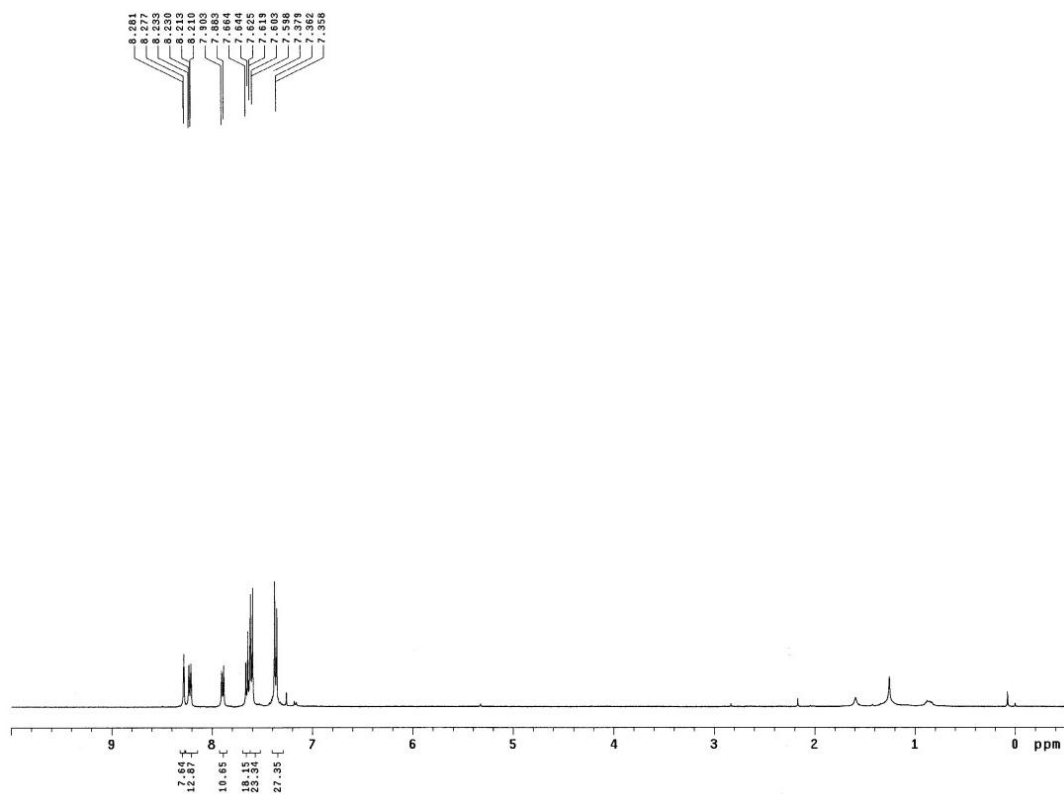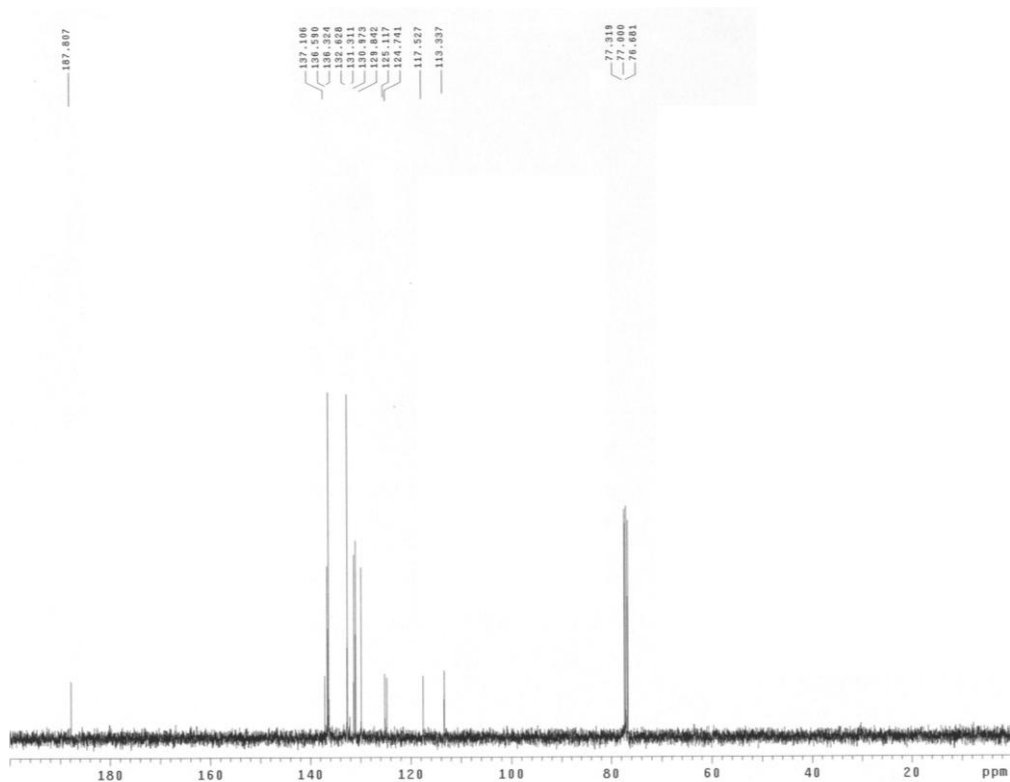

### S-(*n*-Butyl) 4-methoxybenzothioate (4a)

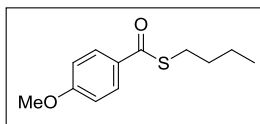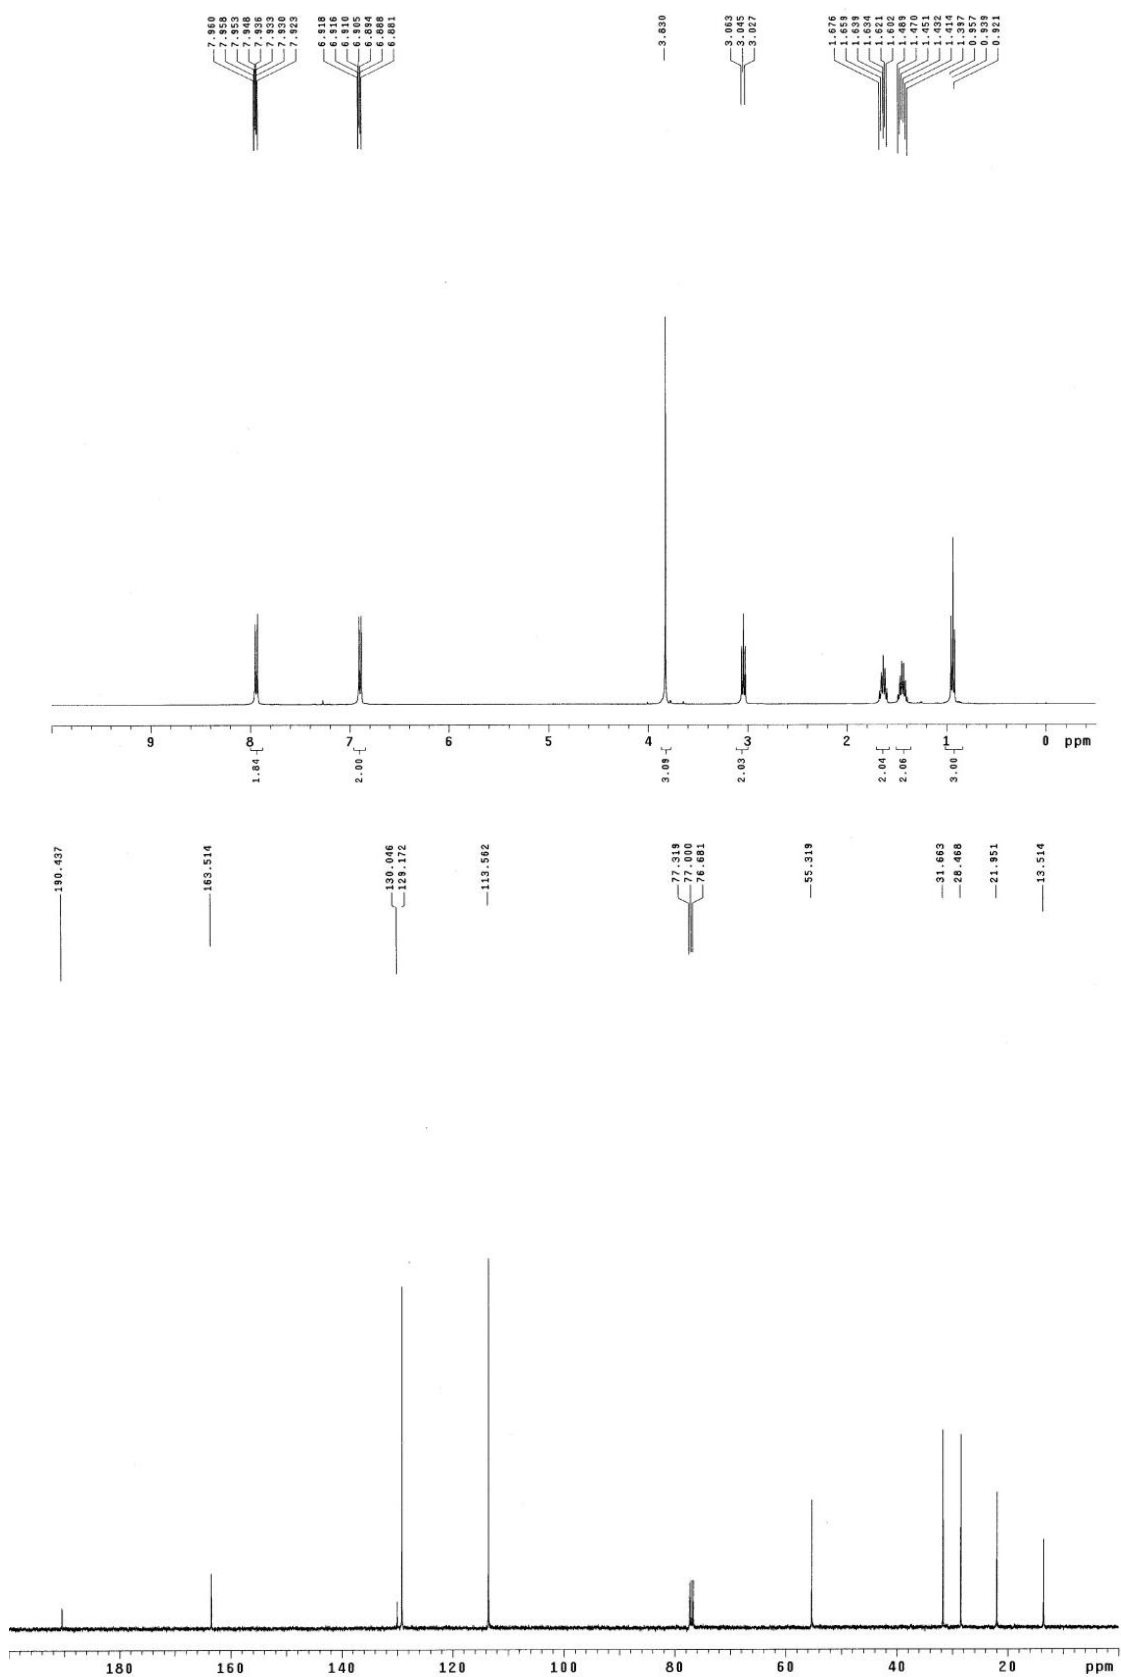

### *S*-(*n*-Dodecyl) 4-methoxybenzothioate (4b)

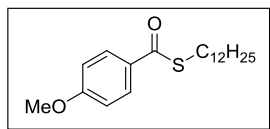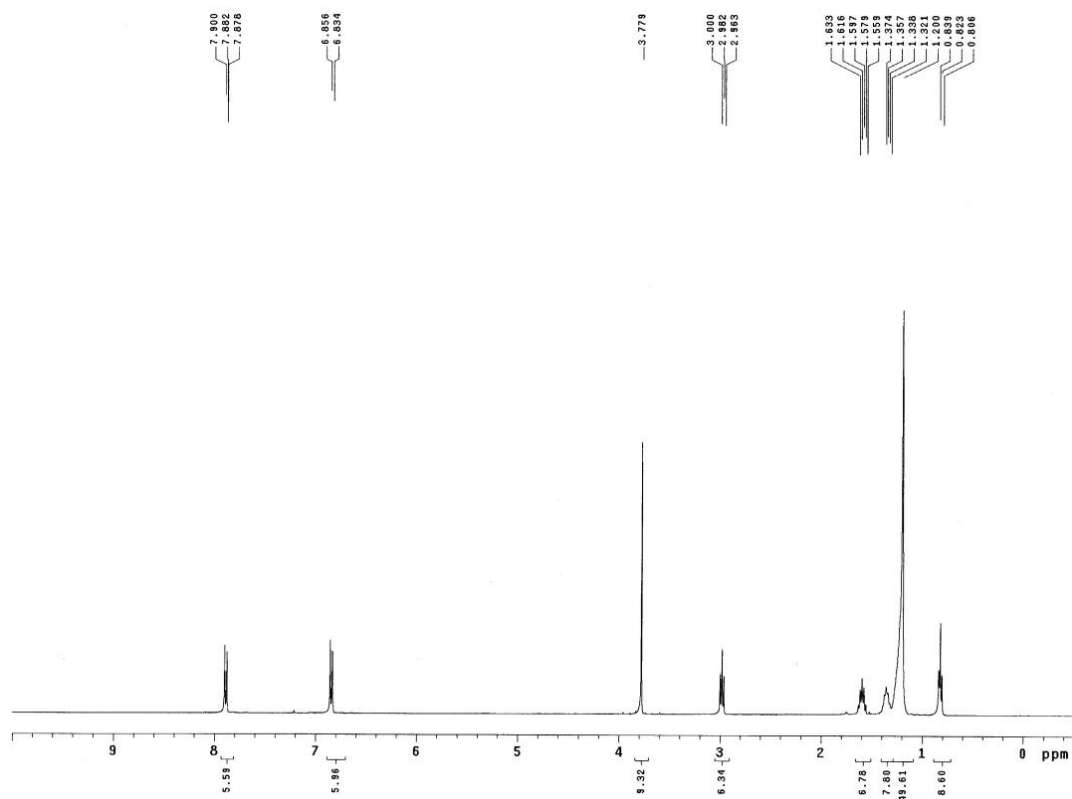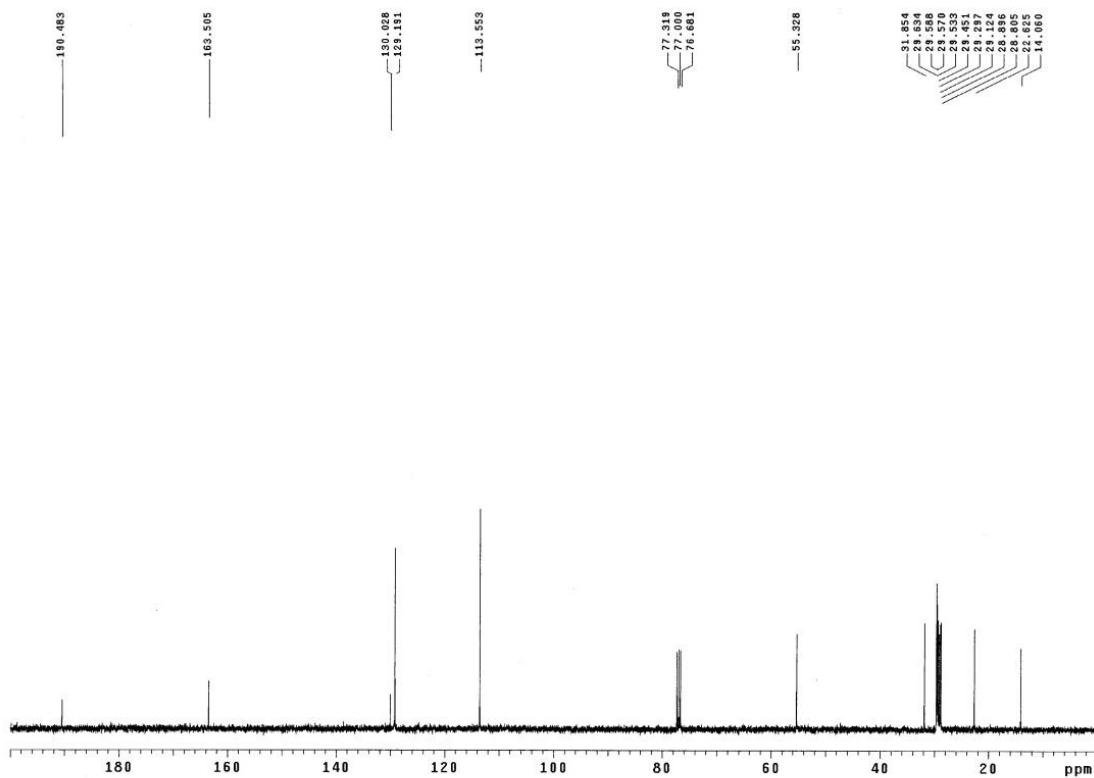

***S*-(*n*-Butyl) 4-(*t*-butyl) benzothioate (4c)**

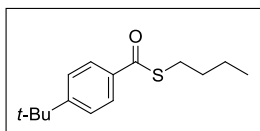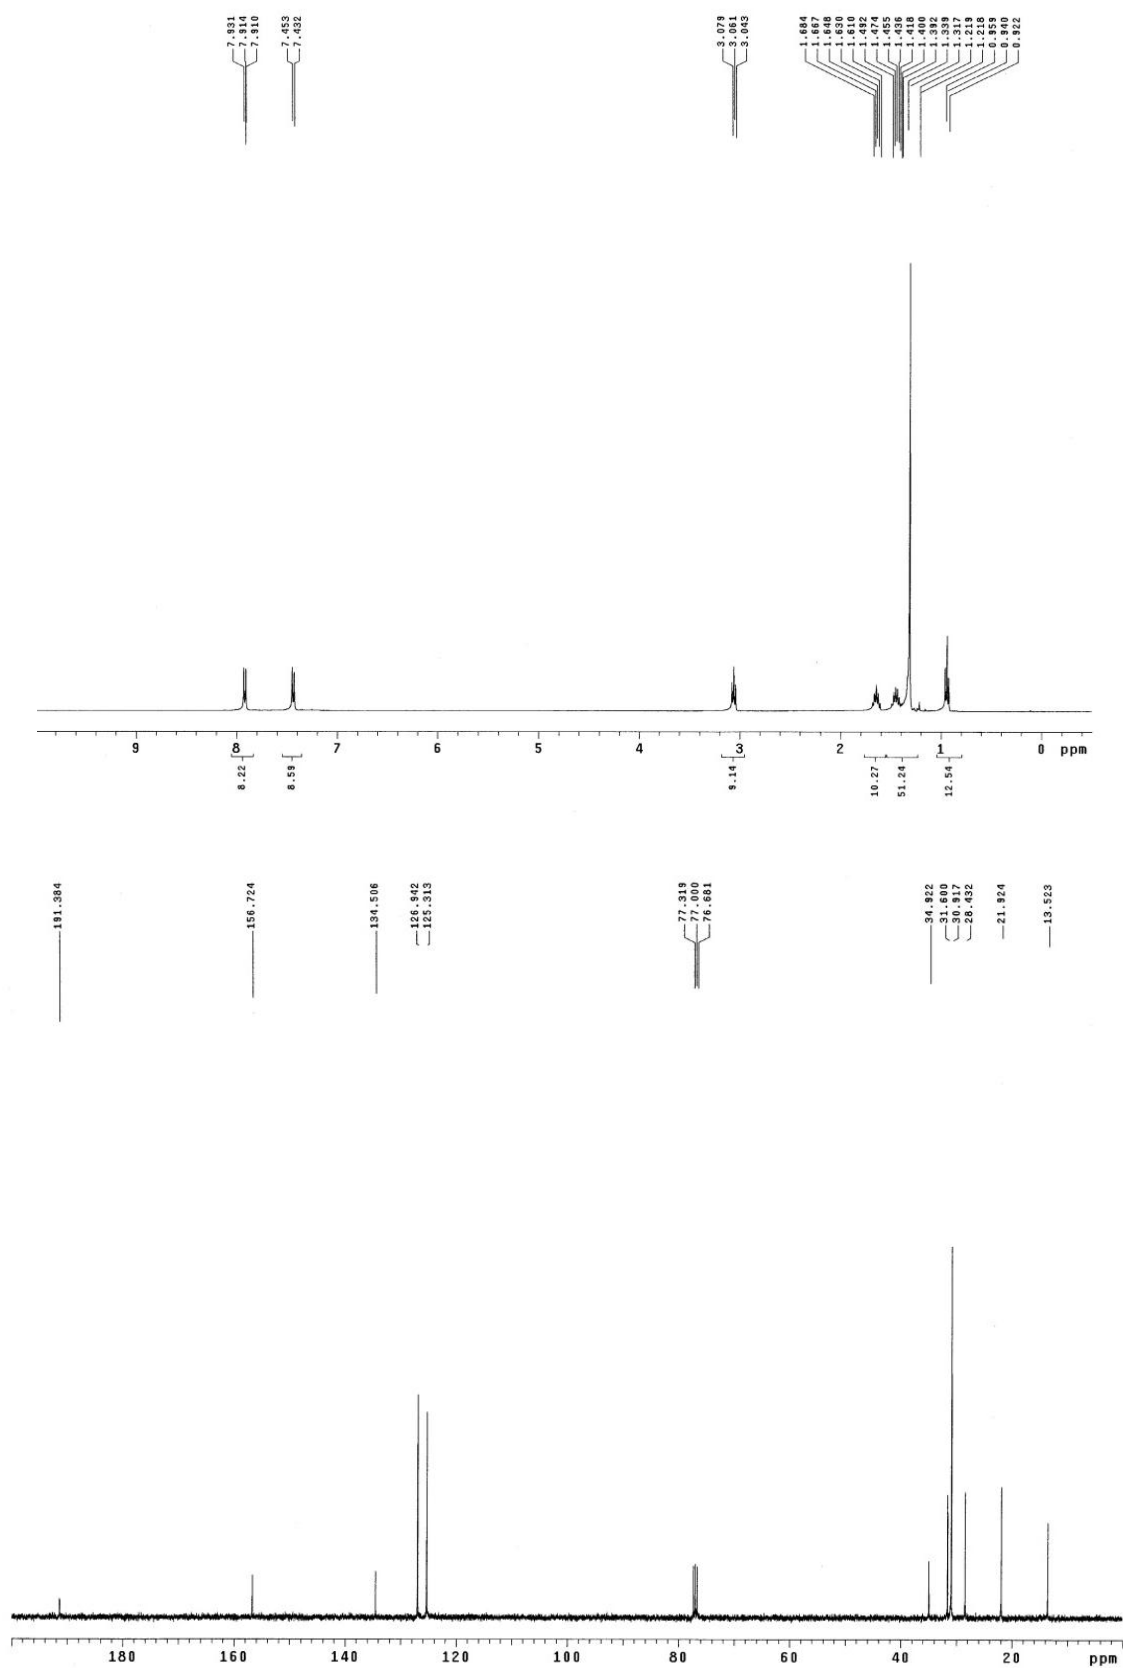

***S*-(*n*-Dodecyl) 4-(*t*-butyl)benzothioate (4d)**

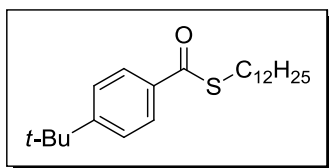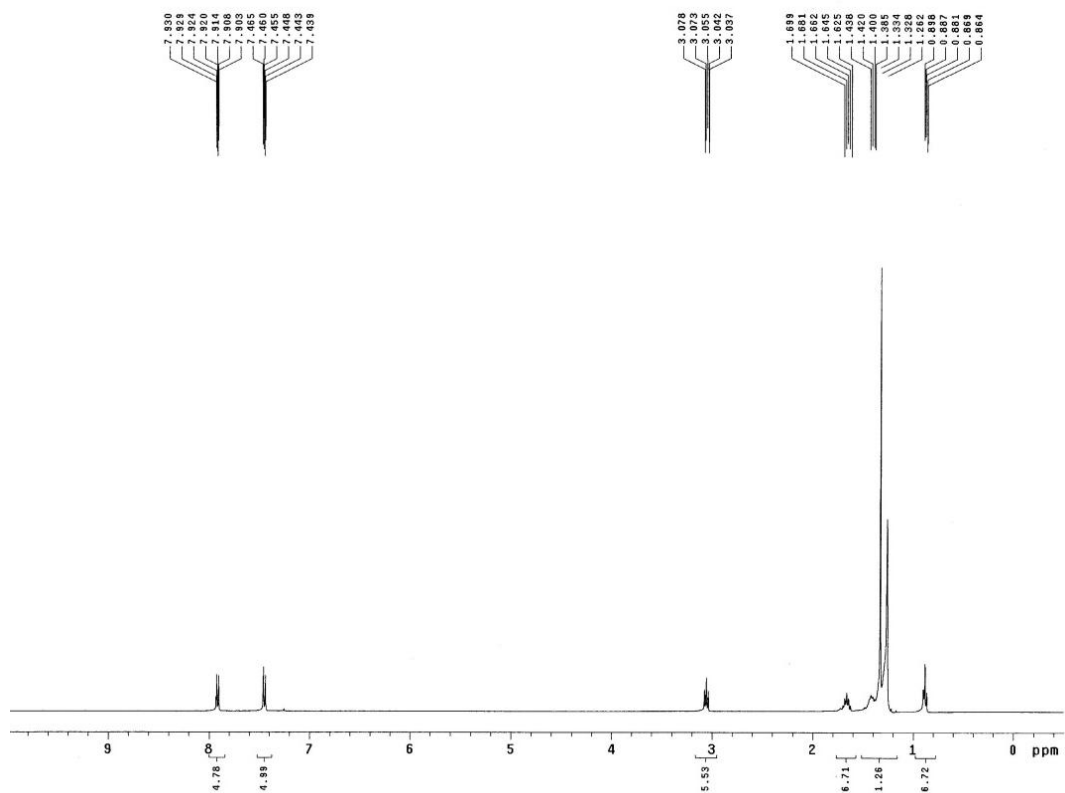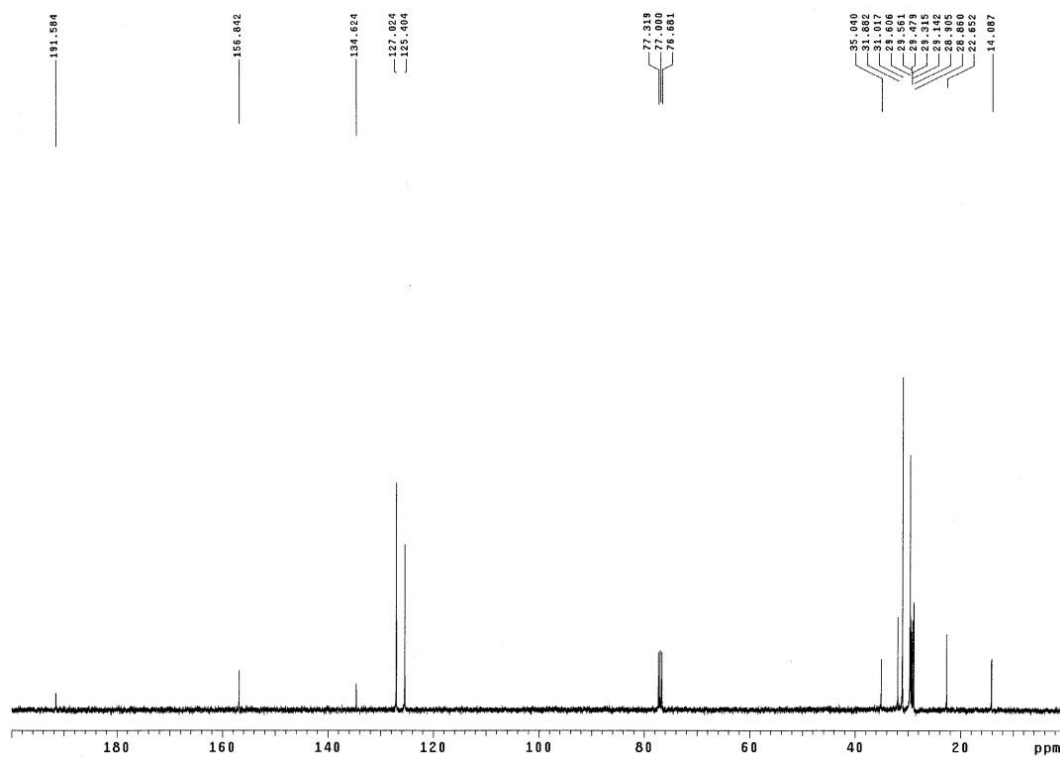



### S-(*n*-Butyl) 4-methylbenzothioate (4e)

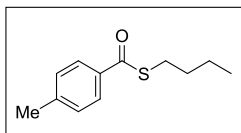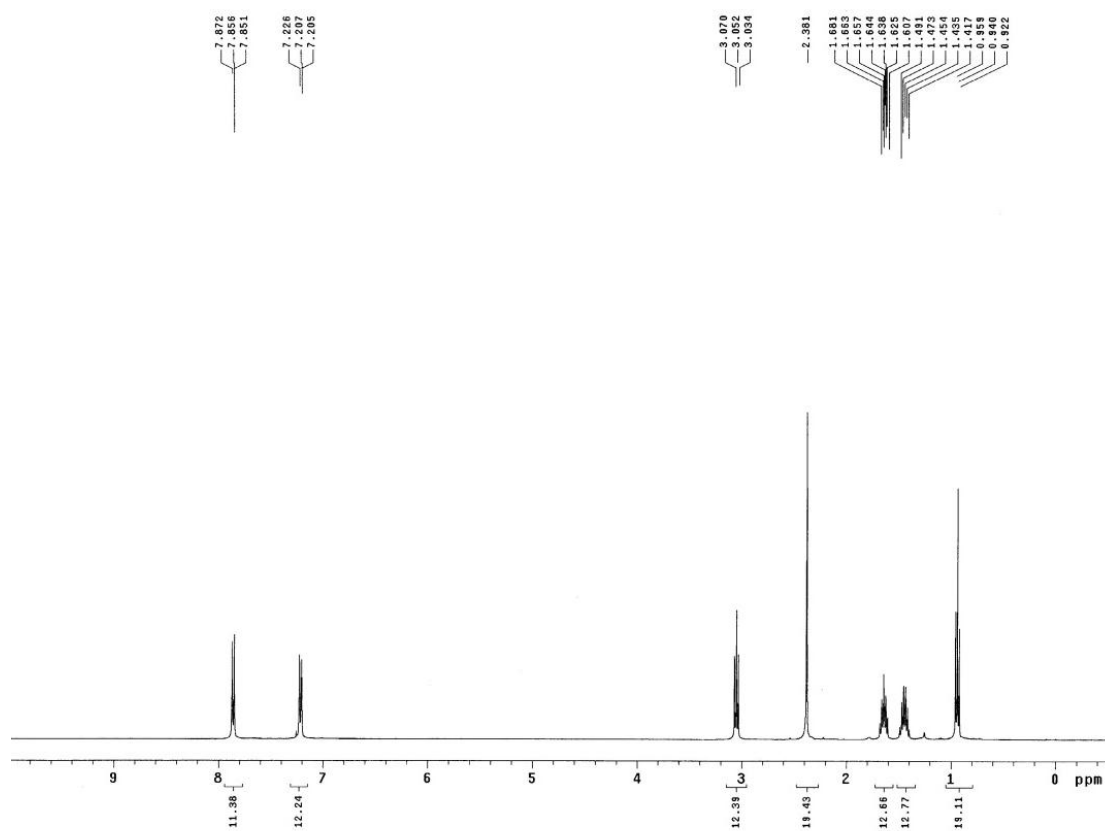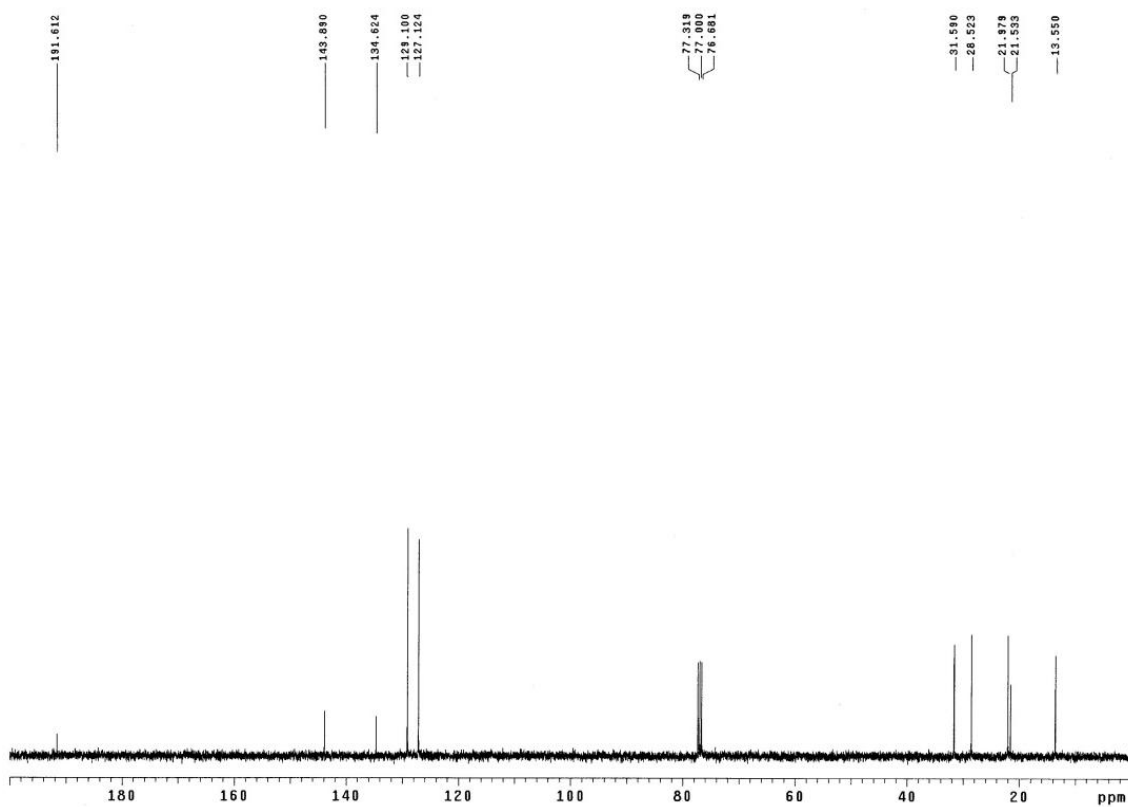

### S-(*n*-Dodecyl) 4-methylbenzothioate (4f)

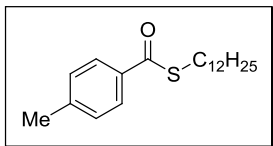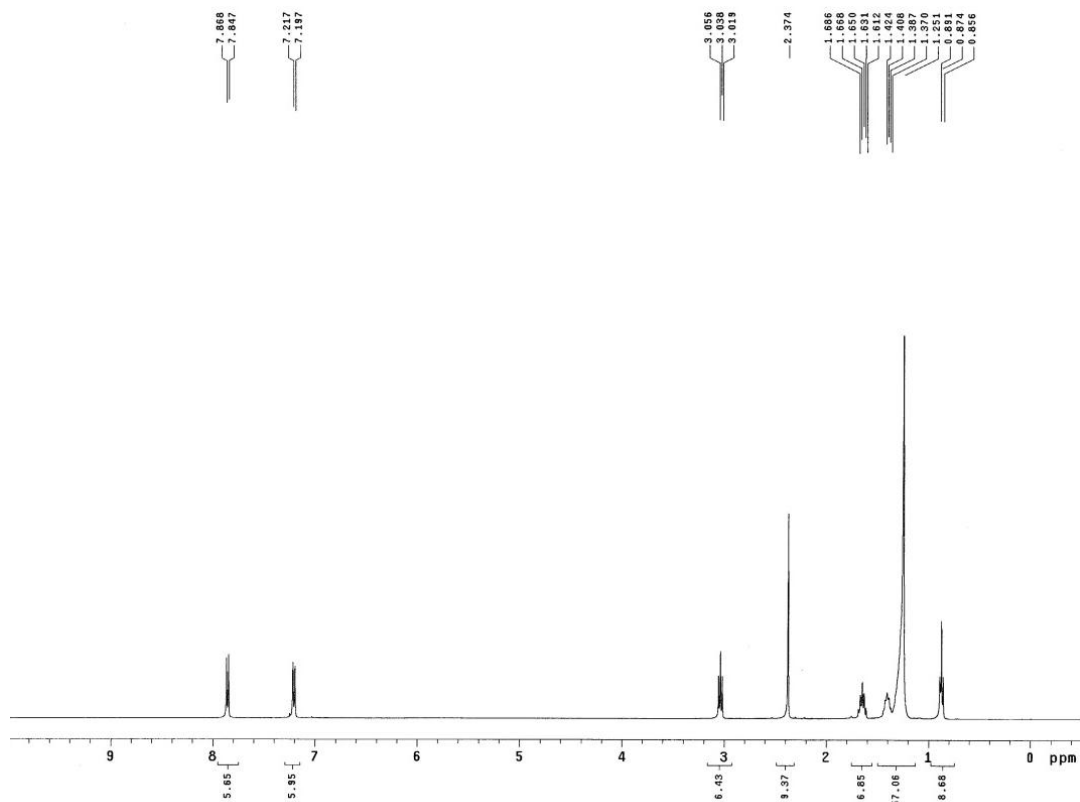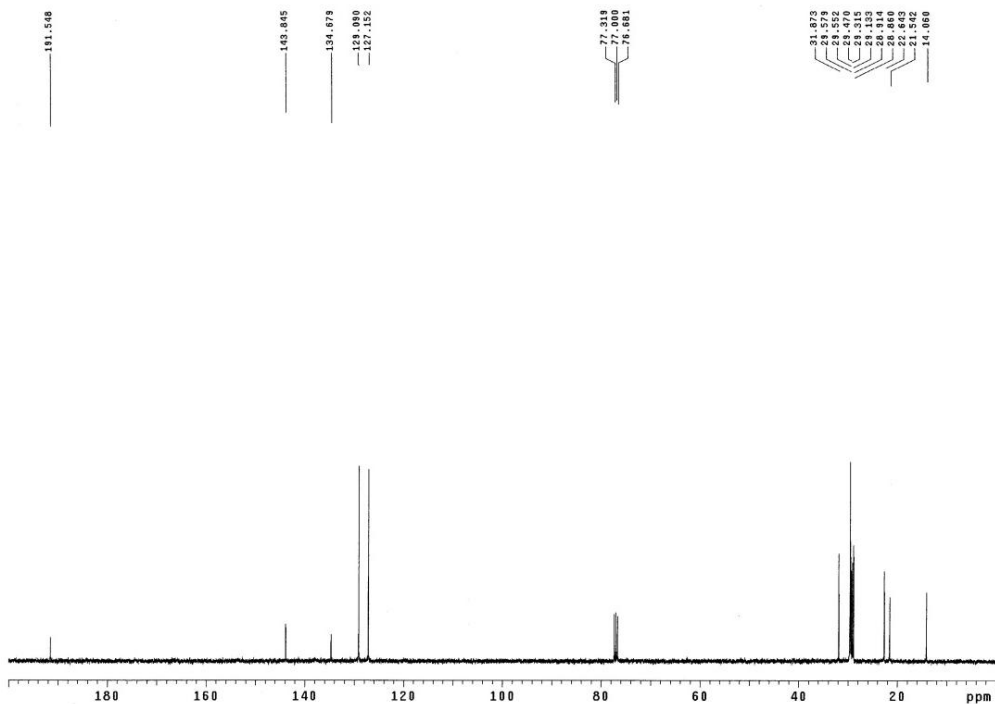

### S-Cyclohexyl 4-methylbenzothioate (4g)

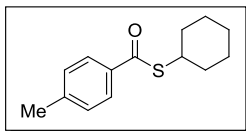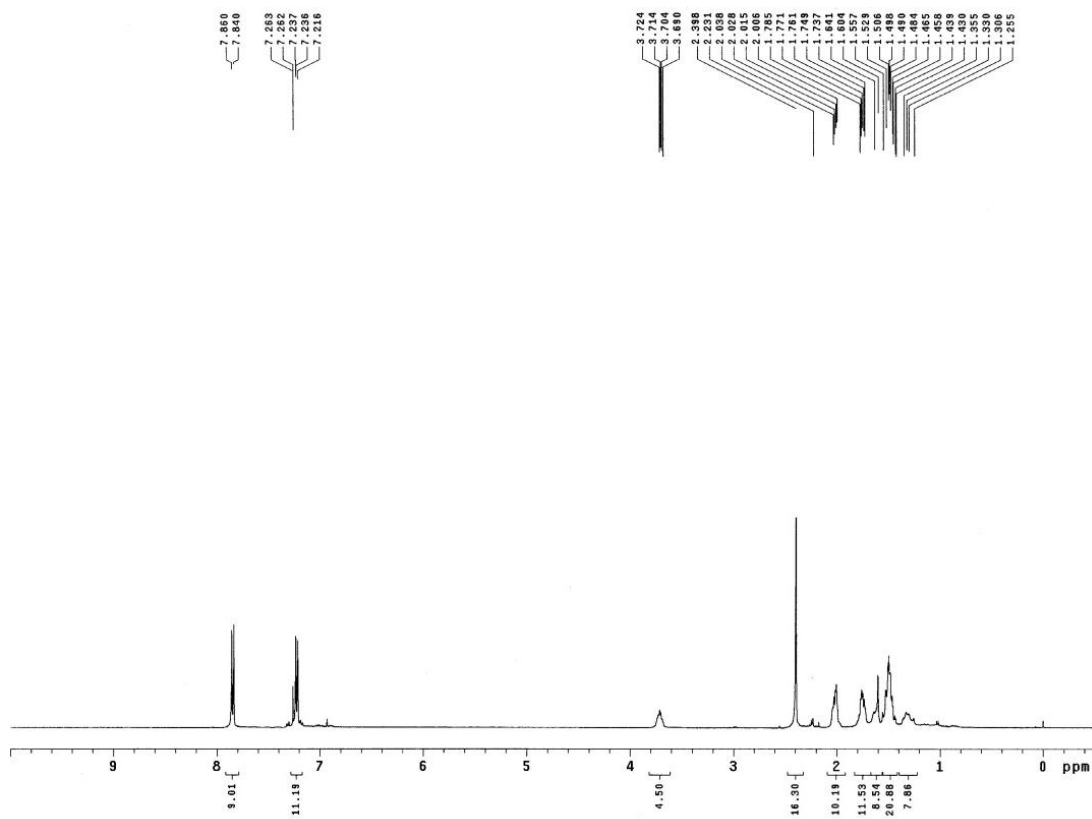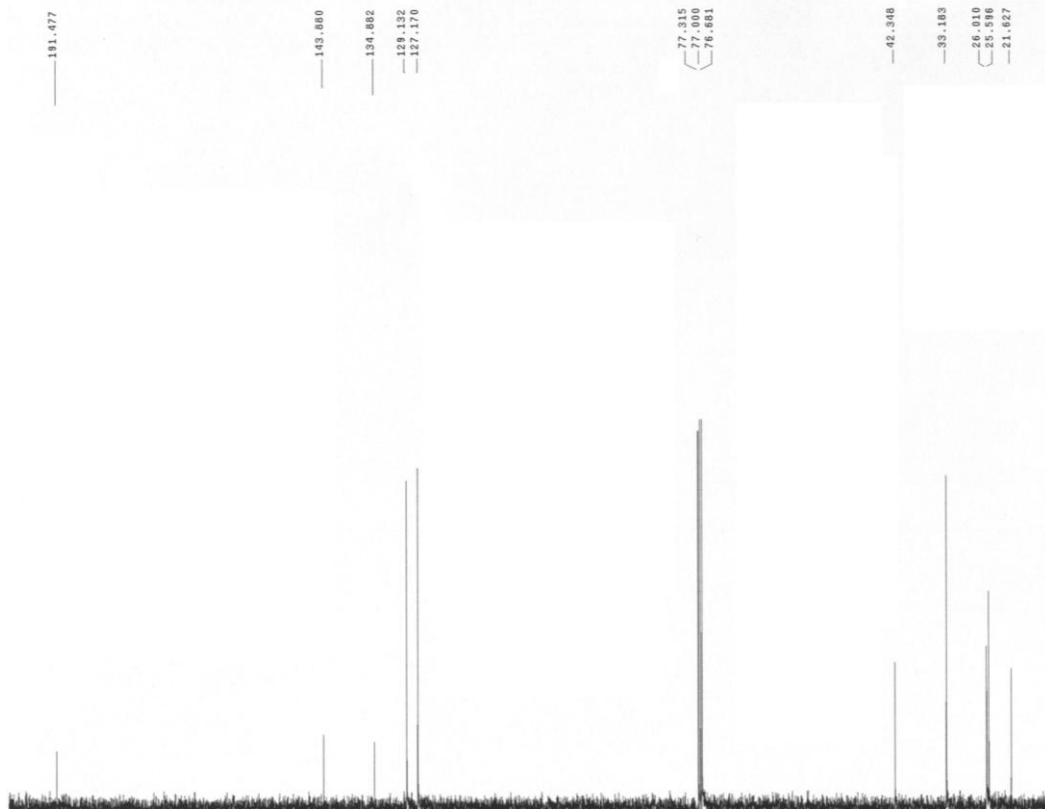

# S-(n-Butyl) benzothioate (4h)

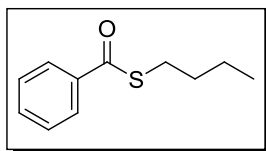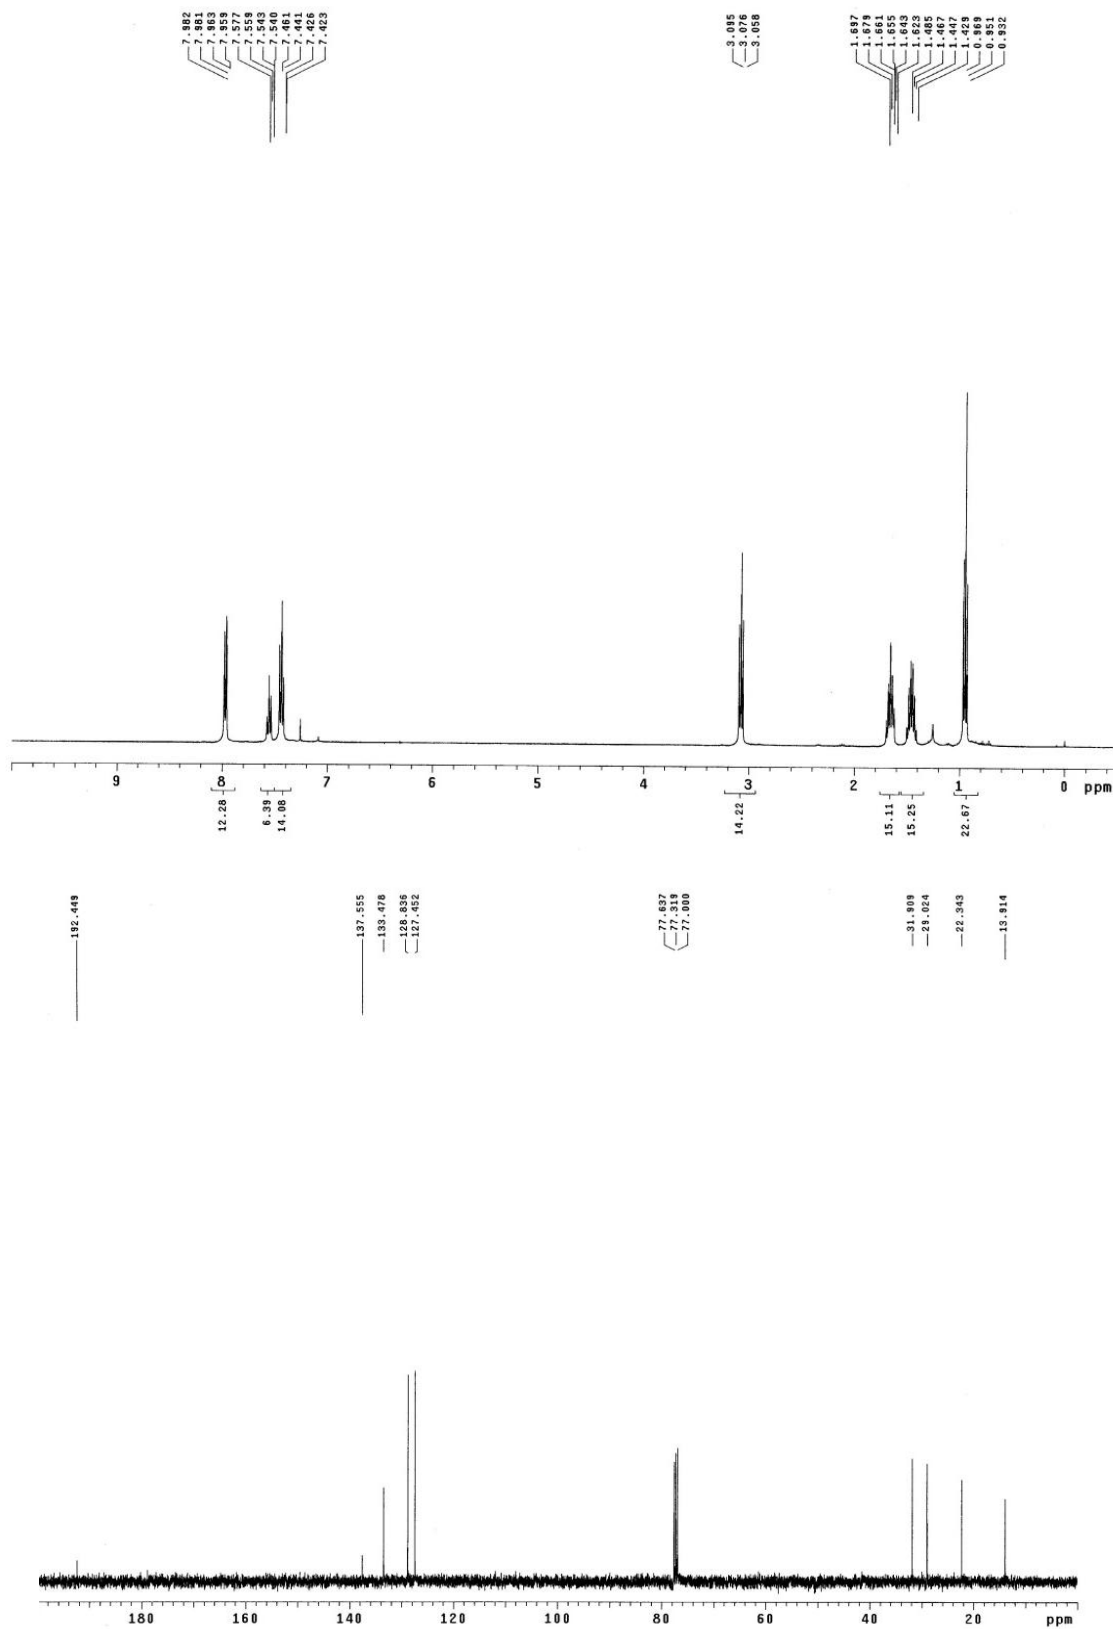





**S-(n-Butyl) 4-chlorobenzothioate (4k)**

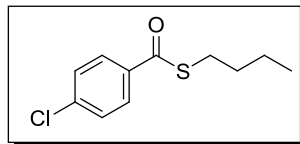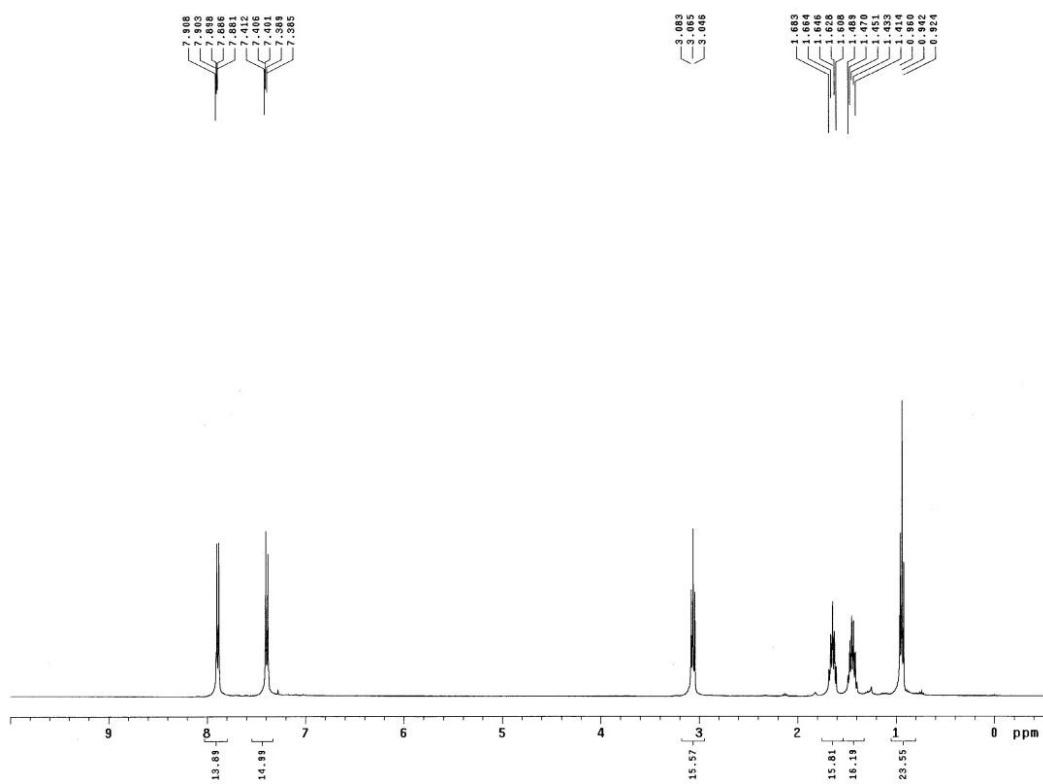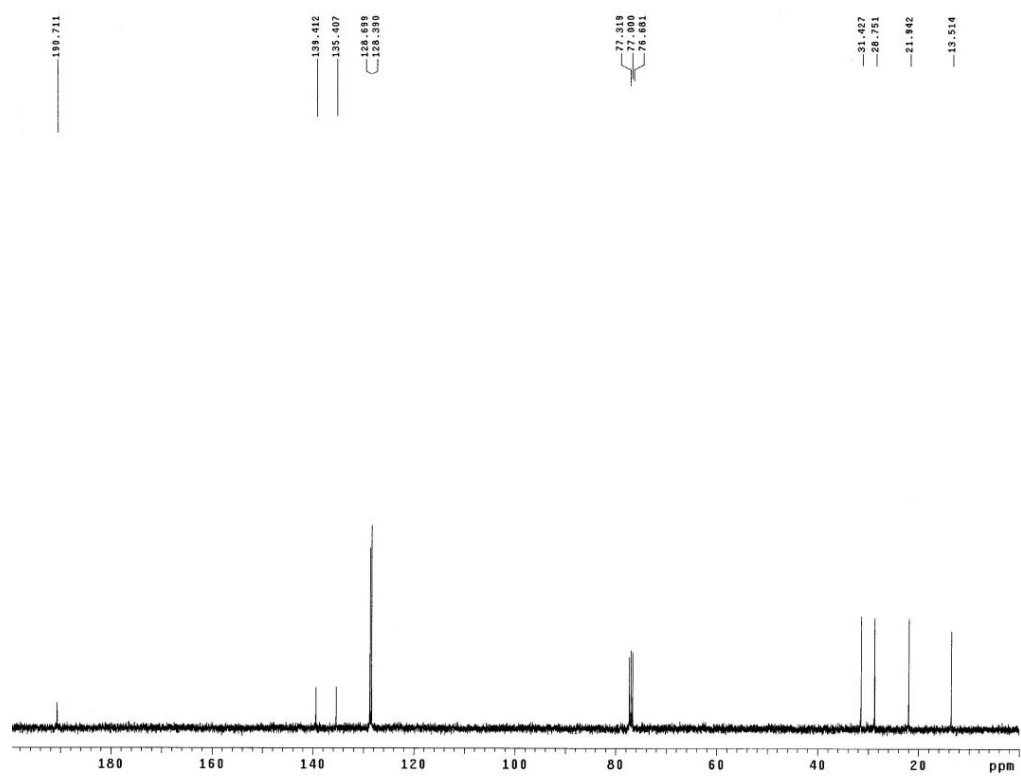

### S-(n-Dodecyl) 4-chlorobenzothioate (4I)

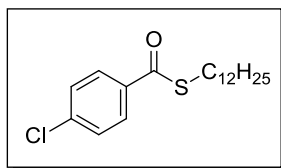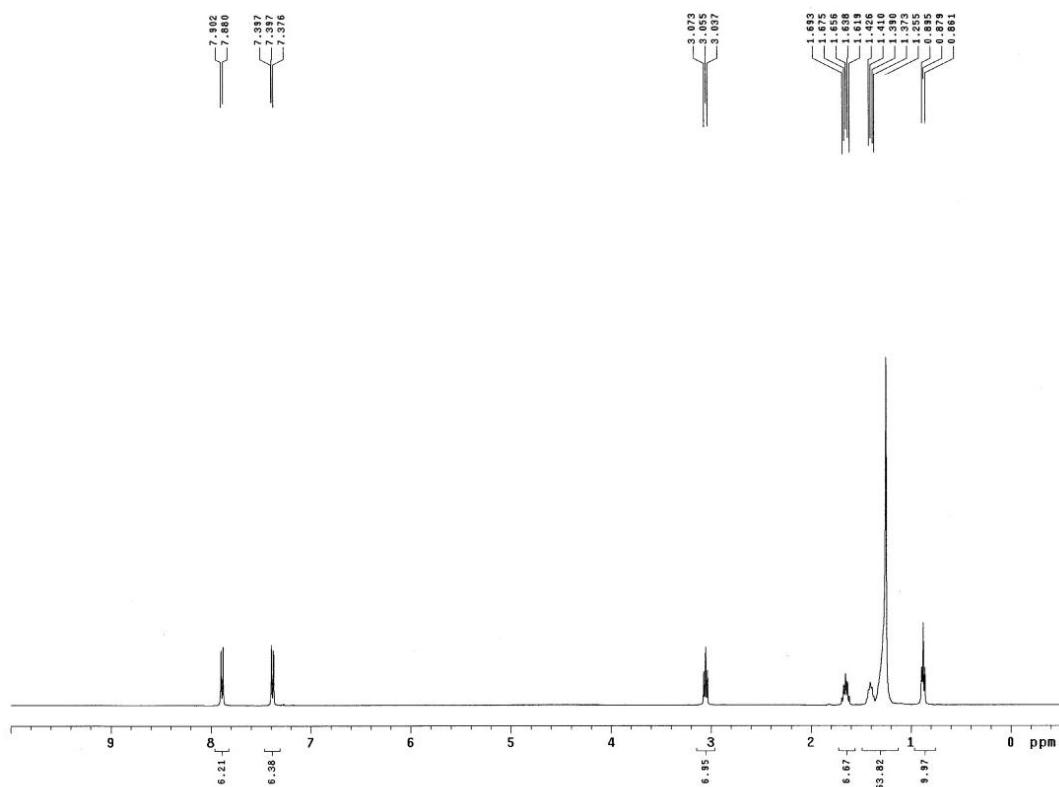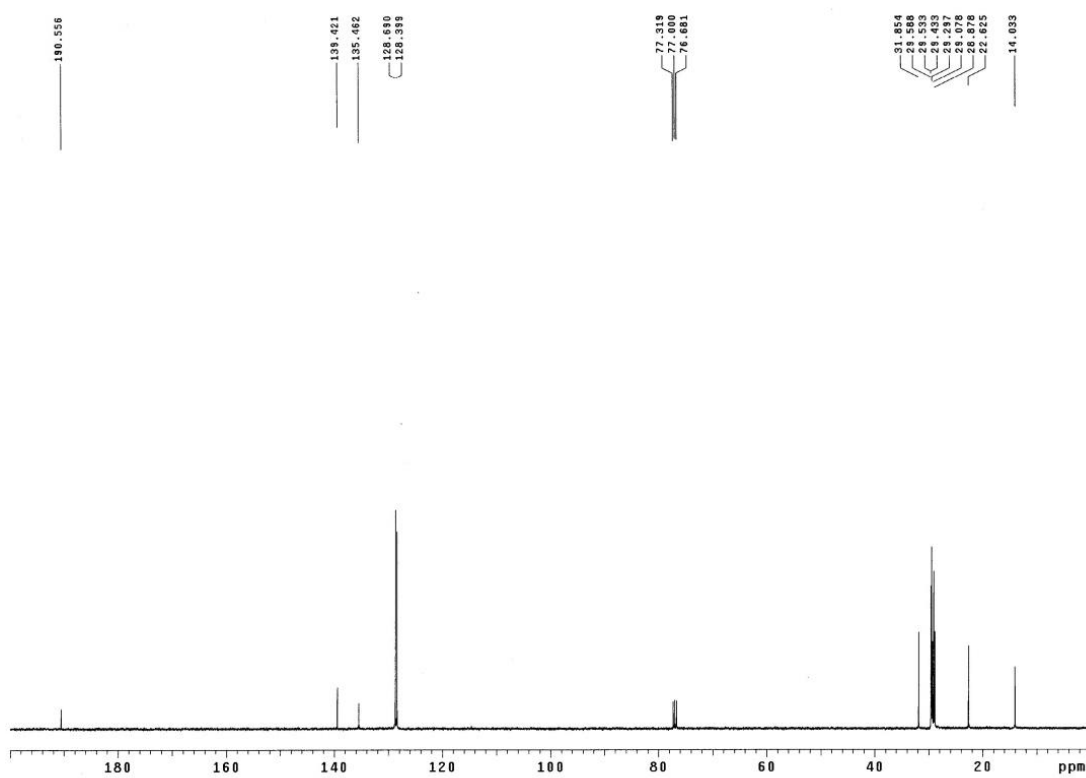



### S-Cyclohexyl 4-chlorobenzothioate (4m)

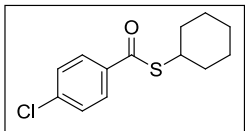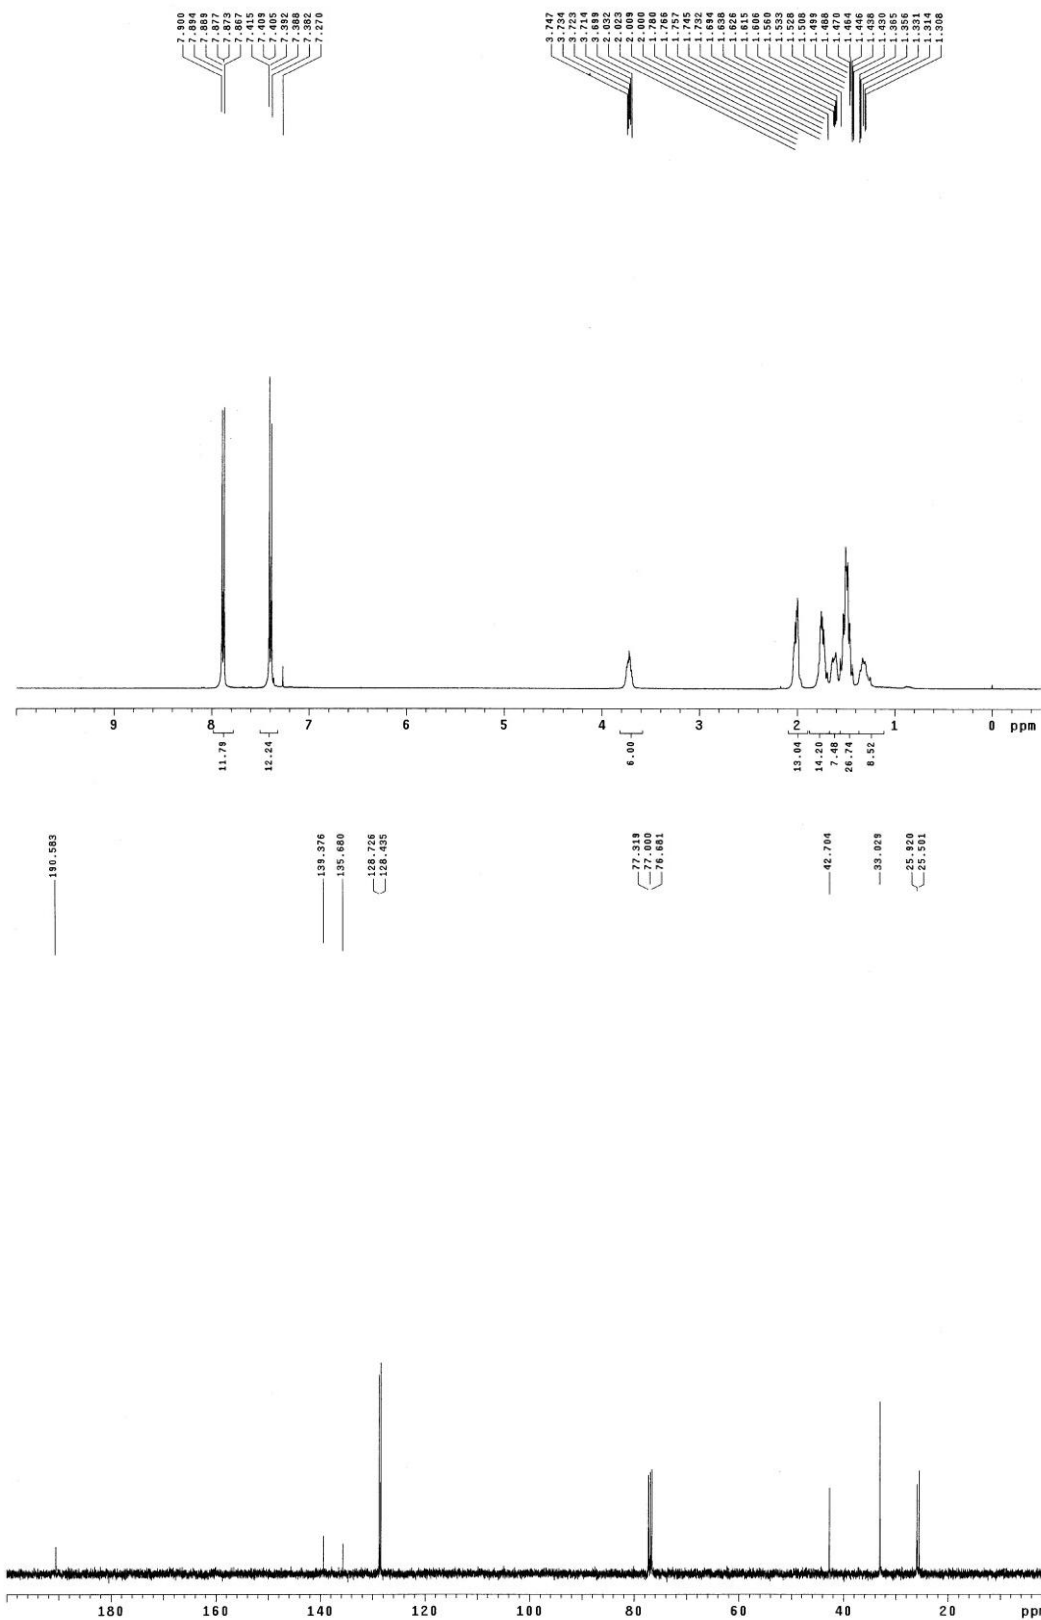

# Ethyl 2-[(4-chlorobenzoyl)thio]acetate (4n)

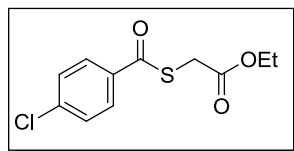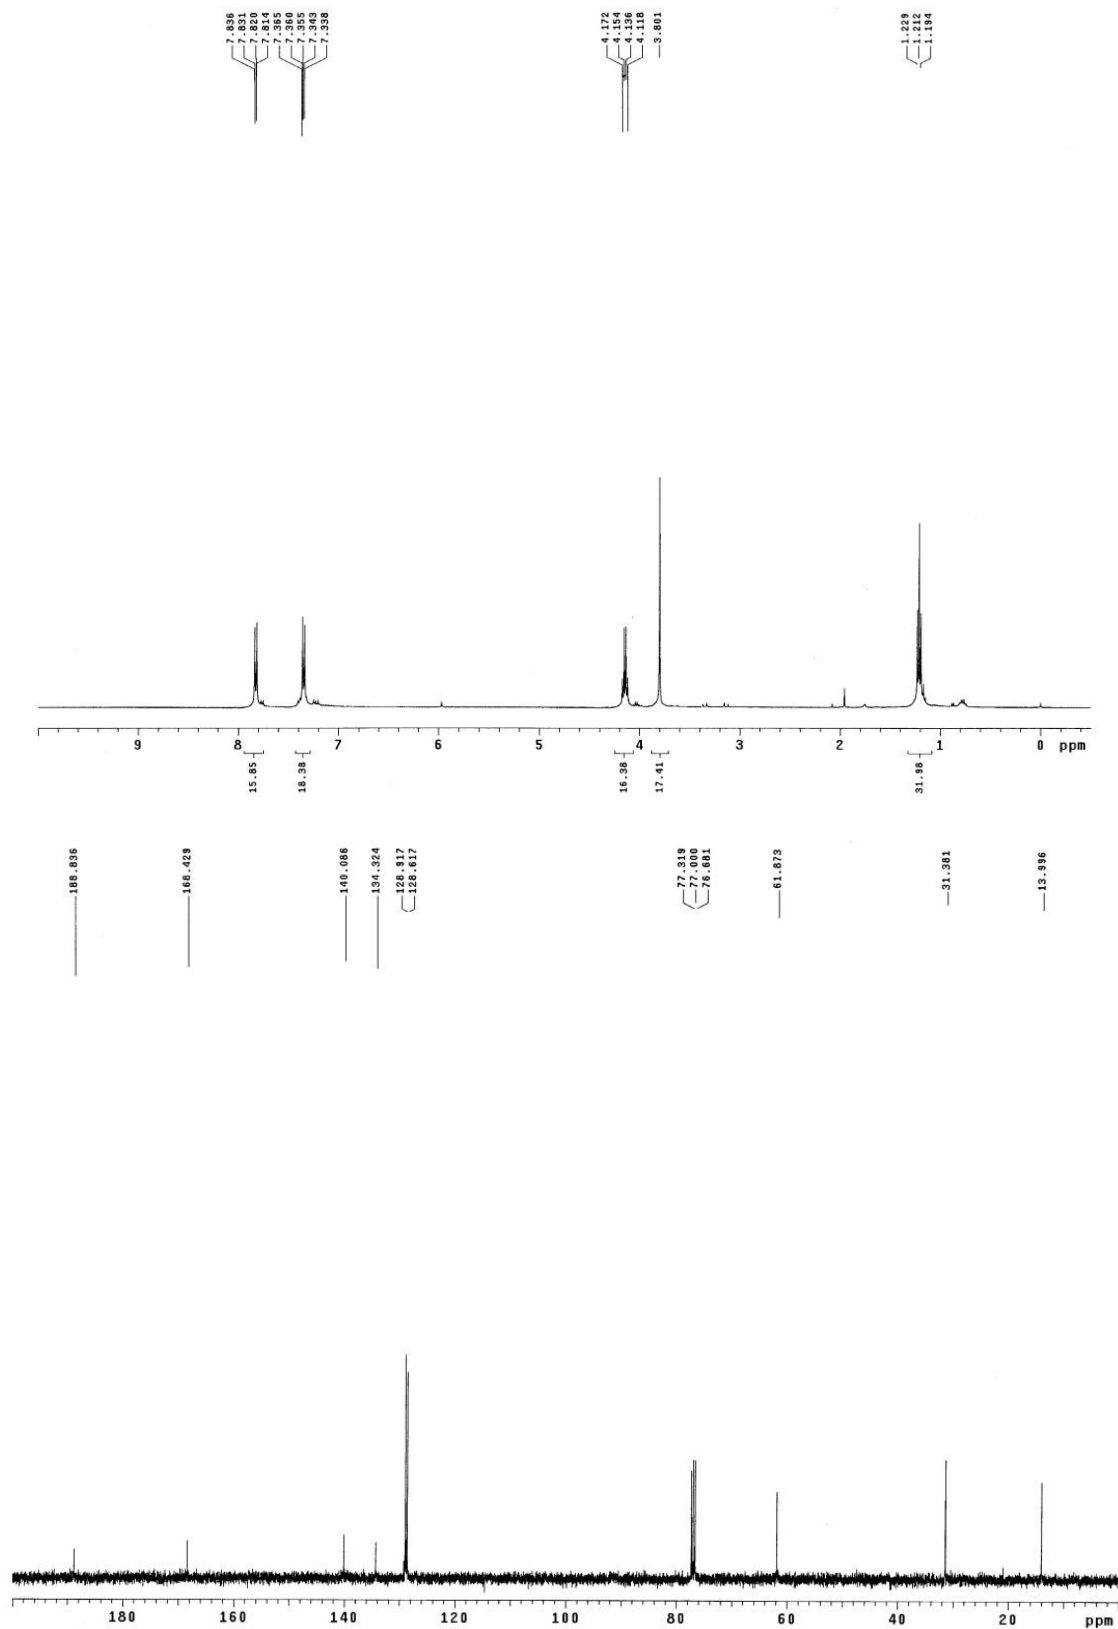

***S*-(*n*-Butyl) thiophene-2-carbothioate (4o)**

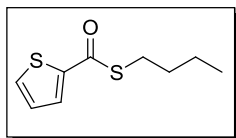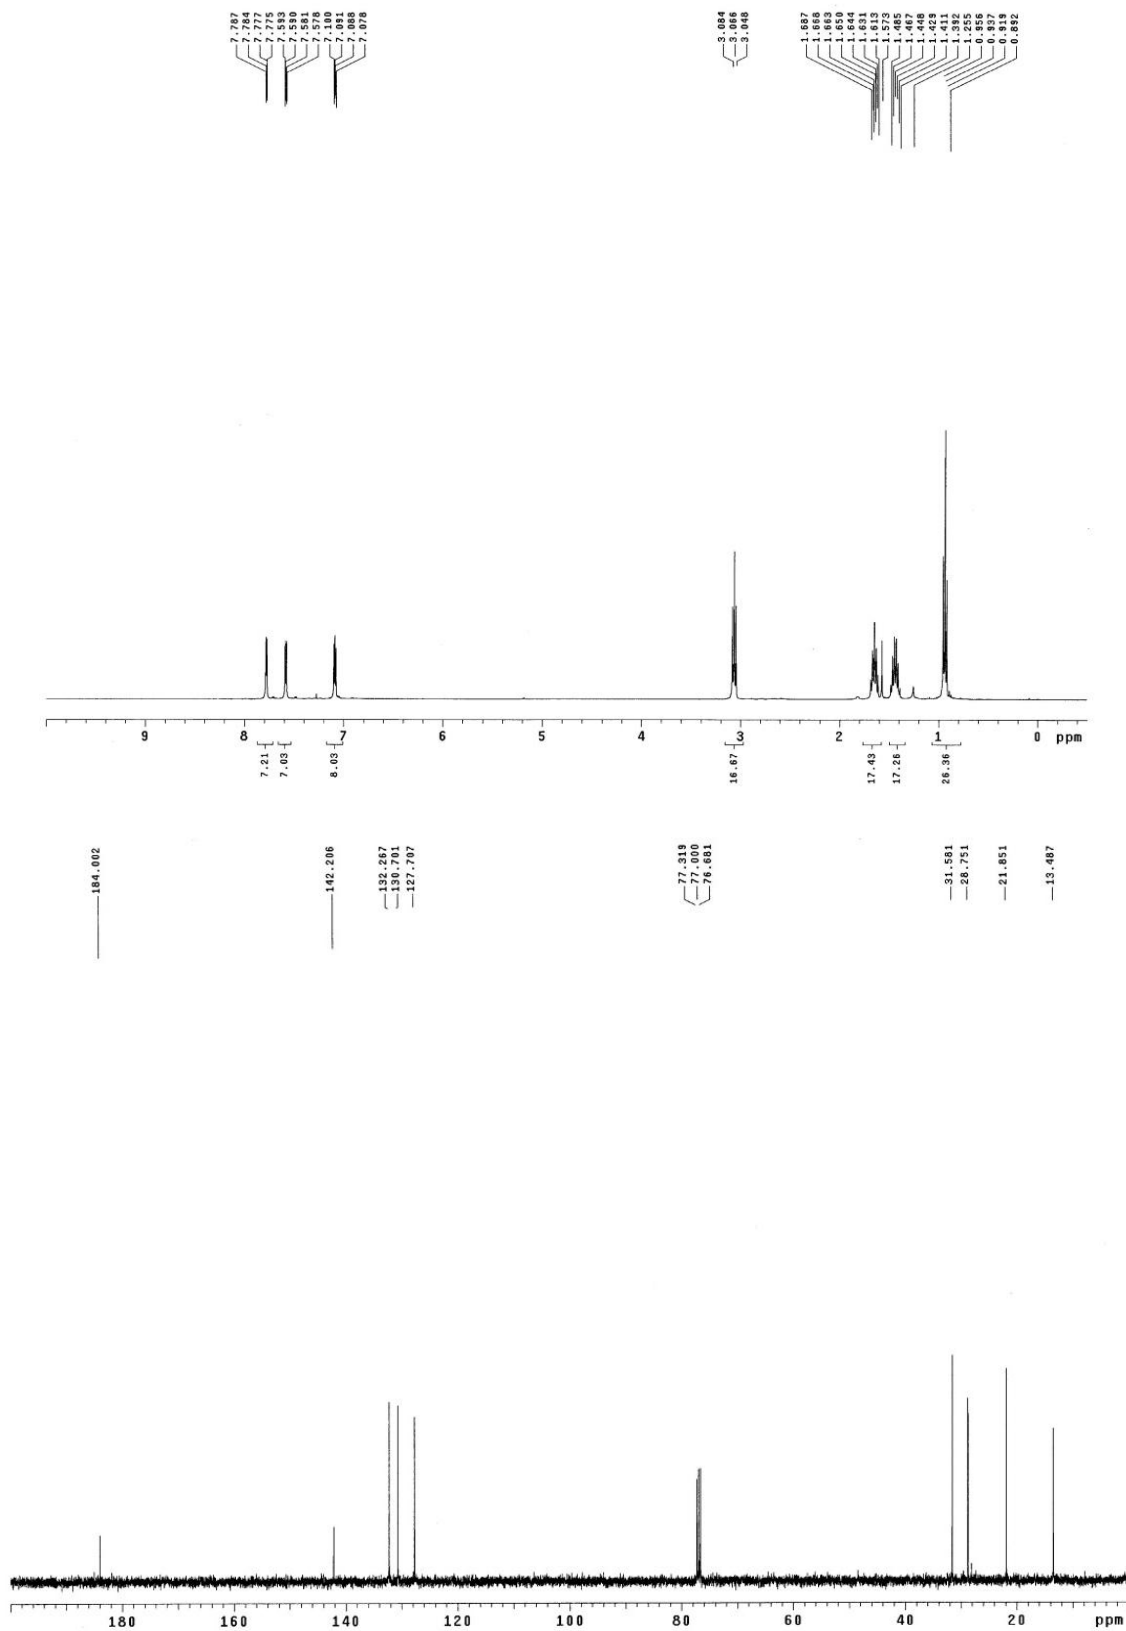

**S-(*n*-Dodecyl) 4-(trifluoromethyl)benzothioate (4p)**

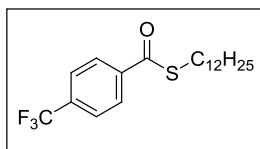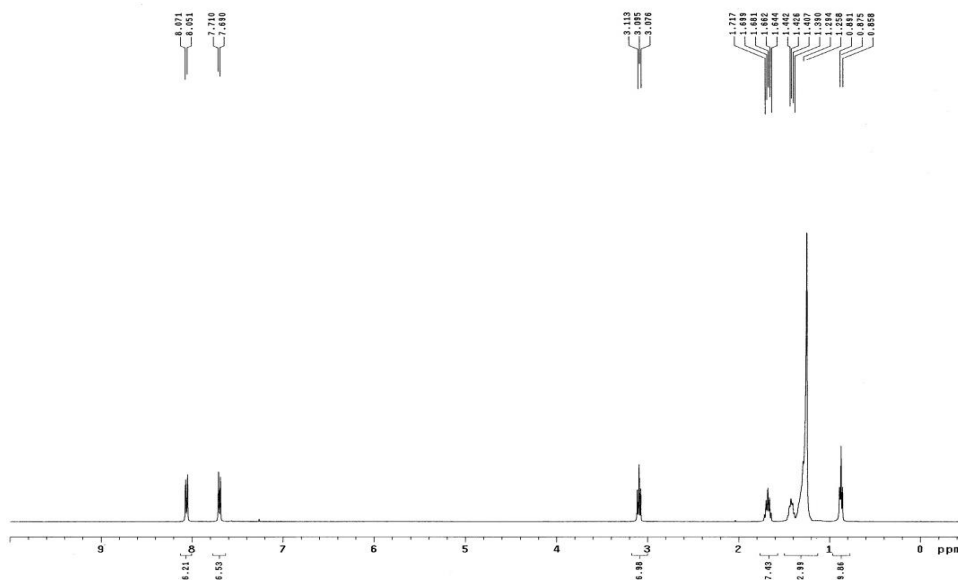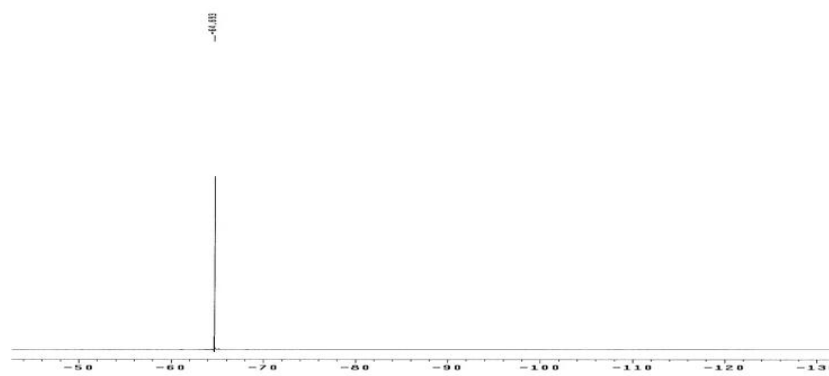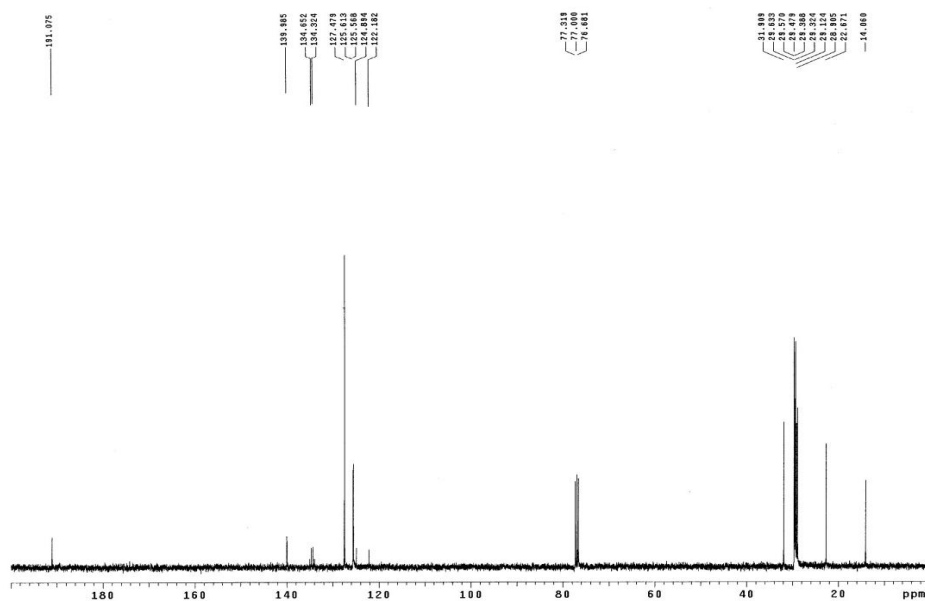

*S*-(*n*-Butyl) 2-methylbenzothioate (4q)

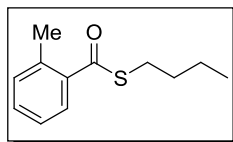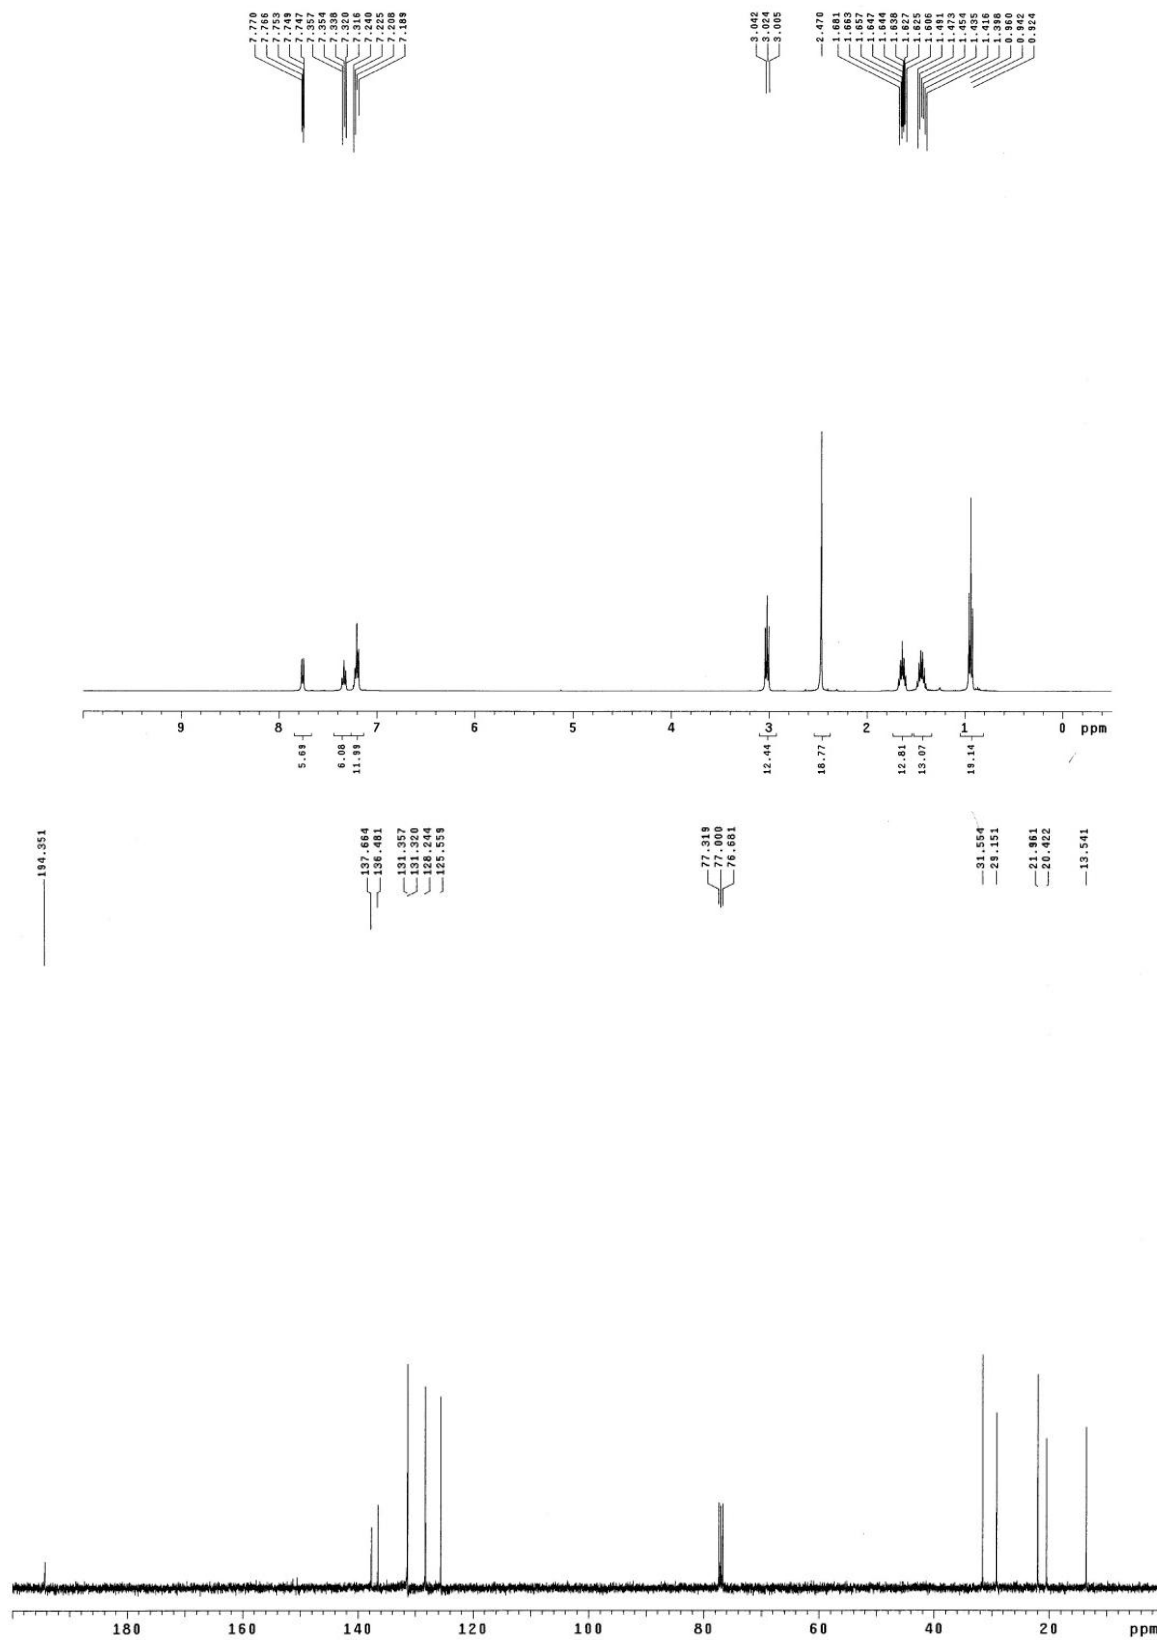

**S-(*n*-Dodecyl) 2-methylbenzothioate (4r)**

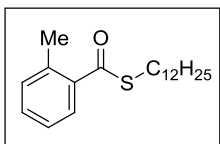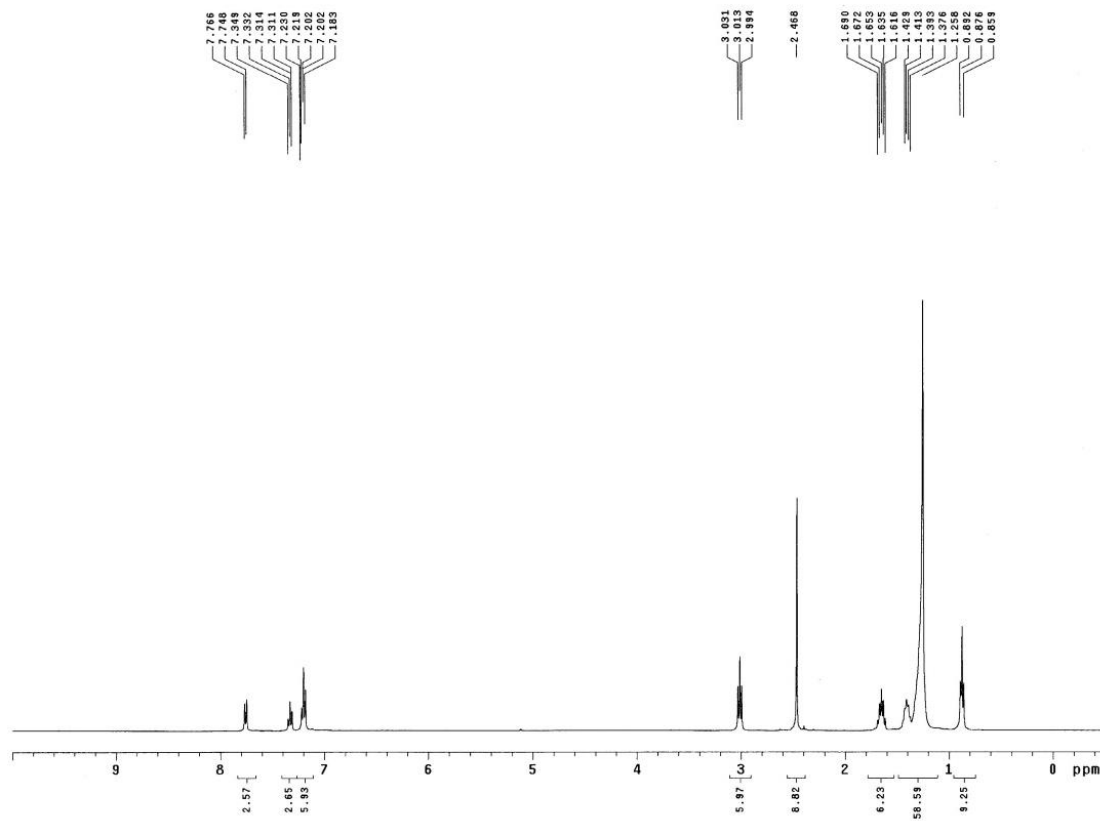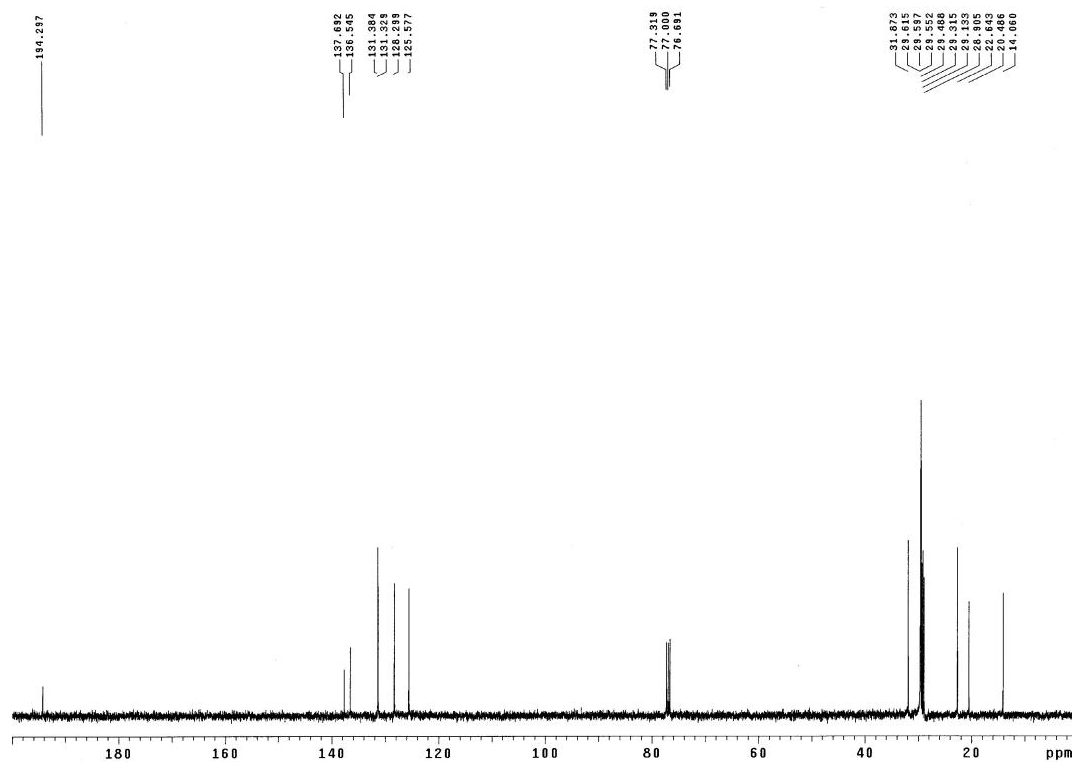

### S-(*n*-Dodecyl) 4-bromobenzothioate (4s)

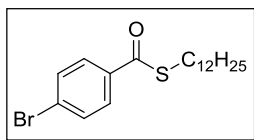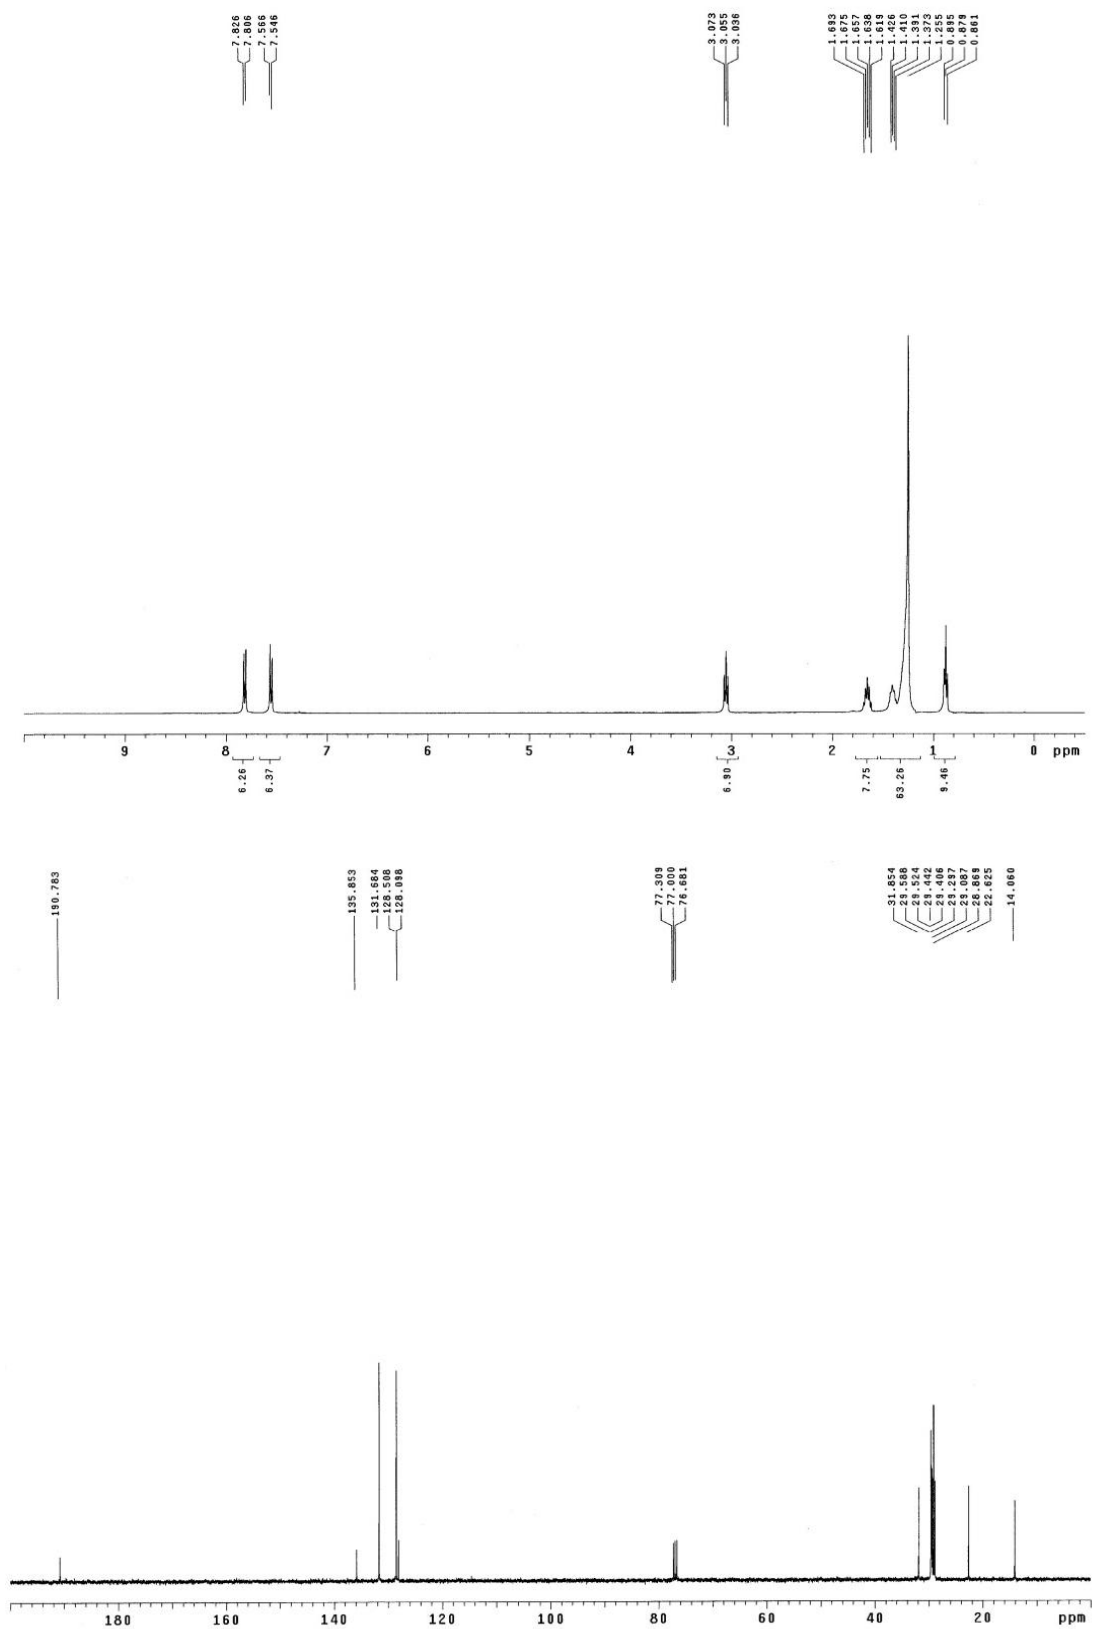

# Ethyl 2-[(4-bromophenyl)thio]acetate (4t)

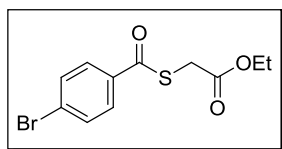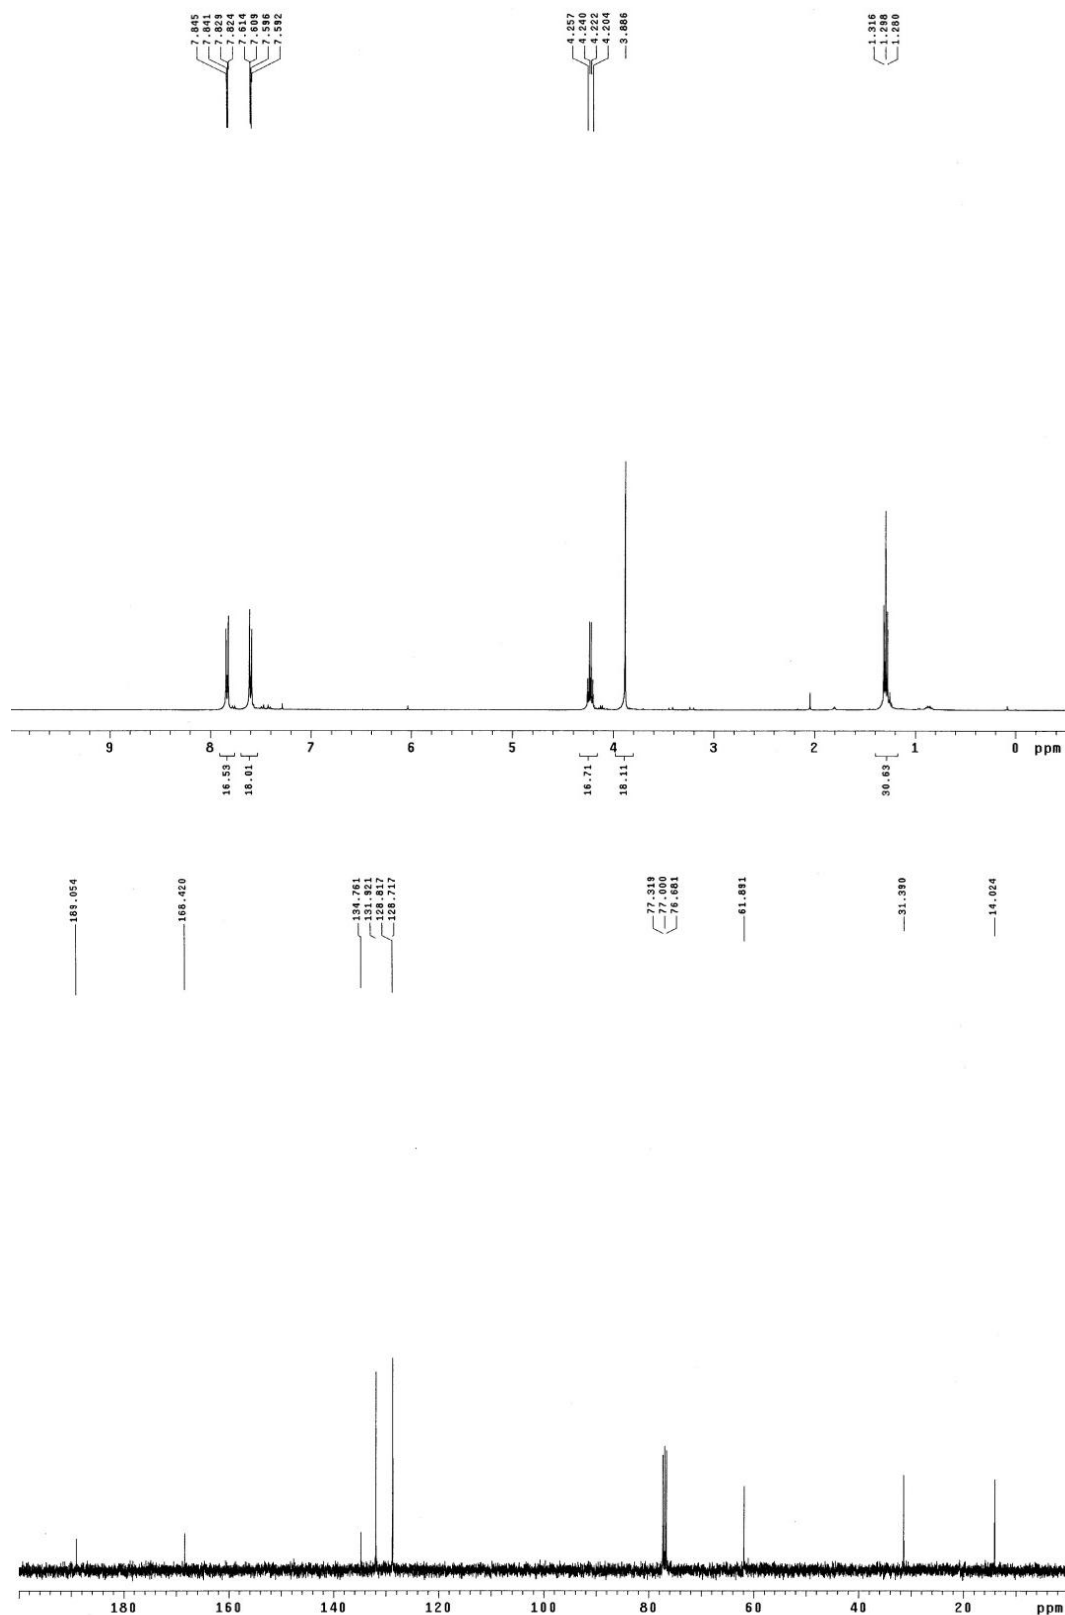





### S-(n-Butyl) 3-iodobenzothioate (4v)

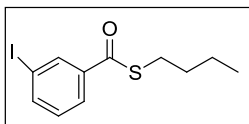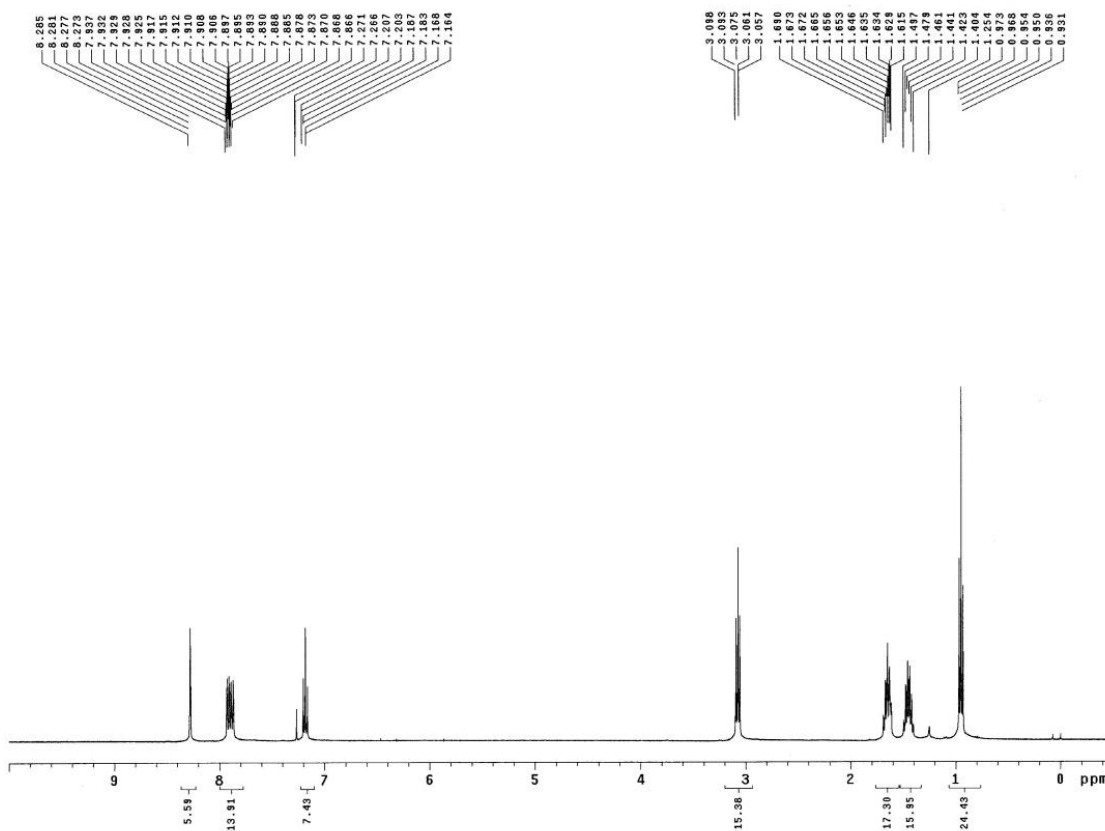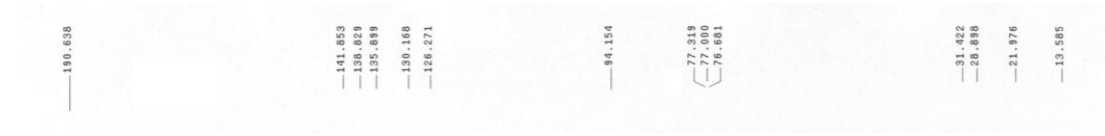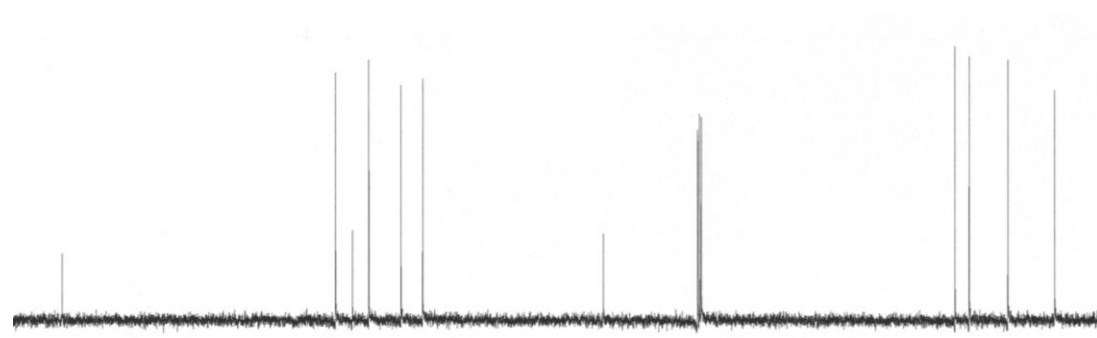

Supplement: c4gc00025k1.pdf [file c4gc00025k1.pdf]
